# Supplementary material for: Palladium-catalyzed direct C–H arylation of pyridine N-oxides with potassium aryl- and heteroaryltrifluoroborates
Source: Royal Society of Chemistry journal article supplement (doi:10.1039/c5ob02409a), 2016-01-01
Supplement: c5ob02409a1.pdf [file c5ob02409a1.pdf]

## Supporting Information

### Palladium-Catalyzed Direct C–H Arylation of Pyridine *N*-oxides with Potassium Aryl- and Heteroaryltrifluoroborates

*Mengli Li, Xing Li,\* Honghong Chang, Wenchao Gao and Wenlong Wei\**

Department of Chemistry and Chemical Engineering, Taiyuan University of Technology, 79 West  
Yingze Street, Taiyuan 030024, People's Republic of China.

*E-mail:* [lixing@tyut.edu.cn](mailto:lixing@tyut.edu.cn)

[weiwenlong@tyut.edu.cn](mailto:weiwenlong@tyut.edu.cn),

#### CONTENTS:

|                                                                  |            |
|------------------------------------------------------------------|------------|
| <b>I. General</b>                                                | <b>S3</b>  |
| <b>II. Optimization of the other reaction parameters</b>         | <b>S3</b>  |
| <b>III. Characterization data for coupling products</b>          | <b>S5</b>  |
| <b>V. References</b>                                             | <b>S10</b> |
| <b>IV. <sup>1</sup>H NMR and <sup>13</sup>C NMR spectra</b>      | <b>S11</b> |
| <sup>1</sup> H NMR of compound <b>3a</b>                         | <b>S11</b> |
| <sup>1</sup> H NMR of compound <b>3b</b>                         | <b>S11</b> |
| <sup>1</sup> H NMR of compound <b>3c</b>                         | <b>S12</b> |
| <sup>1</sup> H NMR of compound <b>3d</b>                         | <b>S12</b> |
| <sup>1</sup> H NMR of compound <b>3e</b>                         | <b>S13</b> |
| <sup>1</sup> H NMR of compound <b>3f</b>                         | <b>S13</b> |
| <sup>1</sup> H NMR and <sup>13</sup> C NMR of compound <b>3g</b> | <b>S14</b> |
| <sup>1</sup> H NMR of compound <b>3h</b>                         | <b>S15</b> |
| <sup>1</sup> H NMR of compound <b>3i</b>                         | <b>S15</b> |
| <sup>1</sup> H NMR of compound <b>3j</b>                         | <b>S16</b> |
| <sup>1</sup> H NMR of compound <b>3k</b>                         | <b>S16</b> |
| <sup>1</sup> H NMR of compound <b>3l</b>                         | <b>S17</b> |
| <sup>1</sup> H NMR of compound <b>3m</b>                         | <b>S17</b> |
| <sup>1</sup> H NMR of compound <b>3n</b>                         | <b>S18</b> |
| <sup>1</sup> H NMR and <sup>13</sup> C NMR of compound <b>3o</b> | <b>S18</b> |
| <sup>1</sup> H NMR and <sup>13</sup> C NMR of compound <b>3p</b> | <b>S19</b> |
| <sup>1</sup> H NMR of compound <b>3q</b>                         | <b>S20</b> |

|                                                                  |     |
|------------------------------------------------------------------|-----|
| <sup>1</sup> H NMR of compound <b>3r</b>                         | S21 |
| <sup>1</sup> H NMR of compound <b>3s</b>                         | S21 |
| <sup>1</sup> H NMR of compound <b>3t</b>                         | S22 |
| <sup>1</sup> H NMR of compound <b>3u</b>                         | S22 |
| <sup>1</sup> H NMR of compound <b>3v</b>                         | S23 |
| <sup>1</sup> H NMR and <sup>13</sup> C NMR of compound <b>3w</b> | S23 |
| <sup>1</sup> H NMR of compound <b>3x</b>                         | S24 |

## I. General

Unless otherwise noted, all reagents were obtained from commercial suppliers and used without further purification. Deuterated solvents were purchased from Aldrich. Refinement of the mixed system through Column chromatography which was performed on silica gel (200-300 mesh) with ethyl acetate (solvent A)/alcohol (solvent B) gradients as elution. In addition, all yields were referred to isolated yields (average of two runs) of compounds unless otherwise specified. On the one hand, the known compounds were partly characterized by melting points (for solid samples),  $^1\text{H}$  NMR, and compared to authentic samples or the literature data. Melting points were determined with a RD-II digital melting point apparatus and were uncorrected.  $^1\text{H}$  NMR data were obtained at 300 K on a Bruker AMX-600 spectrometer. The  $^1\text{H}$  NMR (600 MHz) chemical shifts were measured relative to  $\text{CDCl}_3$  as the internal reference ( $\text{CDCl}_3$ :  $\delta = 7.26$  ppm). Spectra are reported as follows: chemical shift ( $\delta = \text{ppm}$ ), multiplicity (s = singlet, d = doublet, t = triplet, q = quartet, m = multiplet), coupling constants (Hz), integration, and assignment. On the other hand, the unknown compounds were partly characterized by  $^{13}\text{C}$  NMR and HR-MS as well. The  $^{13}\text{C}$  NMR (100 MHz) chemical shifts were given using  $\text{CDCl}_3$  as the internal standard ( $\text{CDCl}_3$ :  $\delta = 77.16$  ppm). High-resolution mass spectra (HR-MS) were obtained with a Waters-Q-TOF-Premier (ESI).

## II. Optimization of the other reaction parameters

An extensive survey of catalysts was conducted and the results are listed in Table *SI*. No reaction was detected in the absence of a catalyst (Table *SI*, entry 1). Using  $\text{Pd}(\text{OAc})_2$  as the catalyst resulted in 60% yield of **3a** (Table *SI*, entry 2). Inferior yields were obtained with  $\text{Cu}(\text{OAc})_2$ ,  $\text{Ni}(\text{OAc})_2 \cdot 4\text{H}_2\text{O}$  and  $\text{FeCl}_3$  (Table *SI*, entries 3-5). Unfortunately, other Pd catalysts including  $\text{PdCl}_2$ ,  $\text{Pd}(\text{dppf})\text{Cl}_2$ ,  $\text{Pd}(\text{PhCN})\text{Cl}_2$ ,  $\text{Pd}(\text{PPh}_3)_2\text{Cl}_2$ ,  $\text{Pd}(\text{dppe})\text{Cl}_2$ ,  $\text{Pd}(\text{PPh}_3)_4$  and  $\text{Pd}(\text{OAc})_2(\text{PPh}_3)$  all gave lower yields (Table *SI*, entries 6-12 vs. 2). The examination of oxidants demonstrated Oxone, TBHP,  $\text{I}_2$ , MCPBA,  $\text{KMnO}_4$ , and  $\text{Cu}(\text{OAc})_2$  provided inferior results (Table *SI*, entries 14-19). When 1,4-dioxane was replaced with DMF, DMSO and NMP, the yield of **3a** was dramatically decreased (Table *SI*, entries 20-22 vs. 2).

Table *SI* Optimization of the catalysts, oxidants and solvents for the reaction<sup>a</sup>

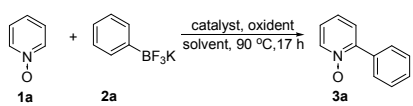

| Entry    | Catalyst                                    | Oxidant                                 | Solvent            | <b>3a</b> (%) <sup>b</sup> |
|----------|---------------------------------------------|-----------------------------------------|--------------------|----------------------------|
| 1        | -                                           | $\text{Ag}_2\text{O}$                   | 1,4-dioxane        | n.r. <sup>c</sup>          |
| <b>2</b> | <b><math>\text{Pd}(\text{OAc})_2</math></b> | <b><math>\text{Ag}_2\text{O}</math></b> | <b>1,4-dioxane</b> | <b>60</b>                  |
| 3        | $\text{Cu}(\text{OAc})_2$                   | $\text{Ag}_2\text{O}$                   | 1,4-dioxane        | 9                          |

|    |                                                    |                      |             |       |
|----|----------------------------------------------------|----------------------|-------------|-------|
| 4  | Ni(OAc) <sub>2</sub> ·4H <sub>2</sub> O            | Ag <sub>2</sub> O    | 1,4-dioxane | 7     |
| 5  | FeCl <sub>3</sub>                                  | Ag <sub>2</sub> O    | 1,4-dioxane | trace |
| 6  | PdCl <sub>2</sub>                                  | Ag <sub>2</sub> O    | 1,4-dioxane | 34    |
| 7  | Pd(dppf)Cl <sub>2</sub>                            | Ag <sub>2</sub> O    | 1,4-dioxane | 19    |
| 8  | Pd(PhCN)Cl <sub>2</sub>                            | Ag <sub>2</sub> O    | 1,4-dioxane | 46    |
| 9  | Pd(PPh <sub>3</sub> ) <sub>2</sub> Cl <sub>2</sub> | Ag <sub>2</sub> O    | 1,4-dioxane | 44    |
| 10 | Pd(dppe)Cl <sub>2</sub>                            | Ag <sub>2</sub> O    | 1,4-dioxane | 39    |
| 11 | Pd(PPh <sub>3</sub> ) <sub>4</sub>                 | Ag <sub>2</sub> O    | 1,4-dioxane | 29    |
| 12 | Pd(OAc) <sub>2</sub> (PPh <sub>3</sub> )           | Ag <sub>2</sub> O    | 1,4-dioxane | 51    |
| 13 | Pd(OAc) <sub>2</sub>                               | -                    | 1,4-dioxane | trace |
| 14 | Pd(OAc) <sub>2</sub>                               | Oxone                | 1,4-dioxane | n.r.  |
| 15 | Pd(OAc) <sub>2</sub>                               | TBHP                 | 1,4-dioxane | 16    |
| 16 | Pd(OAc) <sub>2</sub>                               | I <sub>2</sub>       | 1,4-dioxane | n.r.  |
| 17 | Pd(OAc) <sub>2</sub>                               | MCPBA                | 1,4-dioxane | n.r.  |
| 18 | Pd(OAc) <sub>2</sub>                               | KMnO <sub>4</sub>    | 1,4-dioxane | 7     |
| 19 | Pd(OAc) <sub>2</sub>                               | Cu(OAc) <sub>2</sub> | 1,4-dioxane | trace |
| 20 | Pd(OAc) <sub>2</sub>                               | Ag <sub>2</sub> O    | DMF         | 27    |
| 21 | Pd(OAc) <sub>2</sub>                               | Ag <sub>2</sub> O    | DMSO        | trace |
| 22 | Pd(OAc) <sub>2</sub>                               | Ag <sub>2</sub> O    | NMP         | 29    |

<sup>a</sup> Reactions were carried out with pyridine *N*-oxide **1a** (0.45 mmol), potassium phenyltrifluoroborate **2a** (0.15 mmol), oxidant (0.3 mmol, 2 equiv.) and catalyst (10 mol%) in solvent (0.5 mL) at 90 °C for 17 h. <sup>b</sup> Isolated yields. <sup>c</sup> n.r. = no reaction.

The examination of catalyst loading indicated that 10 mol % was the most suitable (Table S2, entry 1 vs. 2 and 3). 2.0 equiv. of Ag<sub>2</sub>O exhibited the better results (Table S2, entry 5 vs. 4 and 6). It was found that up to 95% yield was obtained when 3.3 equiv of pyridine *N*-oxide **1a** was used at 90 °C (Table S2, entry 9 vs. 7 and 8). Lower yields were offered when using other temperature (Table S2, entry 9 vs. 10 and 11).

Table S2 Optimization of other reaction conditions

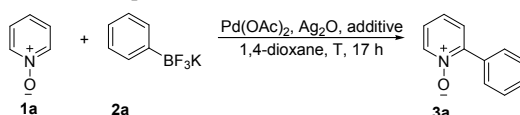

| Entry                | Pd(OAc) <sub>2</sub> (mol%) | Ag <sub>2</sub> O (equiv.) | <b>1a</b> (equiv.) | T (°C)    | Yield (%) <sup>a</sup> |
|----------------------|-----------------------------|----------------------------|--------------------|-----------|------------------------|
| 1 <sup>b</sup>       | 10                          | 2.0                        | 3                  | 90        | 60                     |
| 2 <sup>b</sup>       | 5                           | 2.0                        | 3                  | 90        | 56                     |
| 3 <sup>b</sup>       | 15                          | 2.0                        | 3                  | 90        | 57                     |
| 4 <sup>c</sup>       | 10                          | 1.5                        | 3                  | 90        | 50                     |
| 5 <sup>c</sup>       | 10                          | 2.0                        | 3                  | 90        | 60                     |
| 6 <sup>c</sup>       | 10                          | 2.5                        | 3                  | 90        | 55                     |
| 7 <sup>d</sup>       | 10                          | 2.0                        | 3                  | 90        | 88                     |
| 8 <sup>d</sup>       | 10                          | 2.0                        | 2.5                | 90        | 78                     |
| <b>9<sup>d</sup></b> | <b>10</b>                   | 2.0                        | <b>3.3</b>         | <b>90</b> | <b>95</b>              |
| 10 <sup>e</sup>      | 10                          | 2.0                        | 3.3                | 80        | 92                     |
| 11 <sup>e</sup>      | 10                          | 2.0                        | 3.3                | 100       | 80                     |

<sup>a</sup> Isolated yields. <sup>b</sup> Reactions were carried out with pyridine *N*-oxide **1a** (0.45 mmol, 3 equiv), potassium

phenyltrifluoroborate **2a** (0.15 mmol), Ag<sub>2</sub>O (0.3 mmol, 2 equiv) and Pd(OAc)<sub>2</sub> in 1,4-dioxane (0.5 mL) at 90 °C for 17 h. <sup>c</sup> Reactions were carried out with pyridine *N*-oxide **1a** (0.45 mmol, 3 equiv), potassium phenyltrifluoroborate **2a** (0.15 mmol), Ag<sub>2</sub>O and Pd(OAc)<sub>2</sub> (10 mol %) in 1,4-dioxane (0.5 mL) at 90 °C for 17 h. <sup>d</sup> Reactions were carried out with pyridine *N*-oxide **1a**, potassium phenyltrifluoroborate **2a** (0.15 mmol), Ag<sub>2</sub>O (0.3 mmol, 2 equiv.) Pd(OAc)<sub>2</sub> (10 mol %) and TBAI (20 mol %) in 1,4-dioxane (0.5 mL) at 90 °C for 17 h. <sup>e</sup> Reactions were carried out with pyridine *N*-oxide **1a** (0.5 mmol, 3.3 equiv), potassium phenyltrifluoroborate **2a** (0.15 mmol), Ag<sub>2</sub>O (0.3 mmol, 2 equiv) Pd(OAc)<sub>2</sub> (10 mol %) and TBAI (20 mol %) in 1,4-dioxane (0.5 mL) for 17 h.

---

### III. Characterization data for coupling products

#### *2-phenylpyridine N-oxide (3a)*. [1, 2]

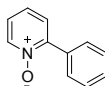

R<sub>f</sub> = 0.5 (AcOEt/Alcohol = 10/1 v/v); light yellow solid; M.p. = 141-142 °C; <sup>1</sup>H NMR (600 MHz, CDCl<sub>3</sub>): δ = 7.20-7.24 (m, 1H), 7.28 (td, *J* = 7.6, 1.1 Hz, 1H), 7.41 (dd, *J* = 8.0, 2.2 Hz, 1H), 7.44-7.47 (m, 1H), 7.46-7.50 (m, 2H), 7.80-7.83 (m, 2H), 8.32 (dd, *J* = 6.6, 0.7 Hz, 1H) ppm. IR (cm<sup>-1</sup>, KBr): 3063, 3044, 1477, 1418, 1240, 841, 759, 724, 697.

#### *2-(4-methoxyphenyl)-pyridine N-oxide (3b)*. [3, 4, 5, 6]

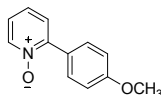

R<sub>f</sub> = 0.6 (AcOEt/Alcohol = 6/1 v/v); Yellowish solid; M.p. = 121-123 °C; <sup>1</sup>H NMR (600 MHz, CDCl<sub>3</sub>): δ = 3.87 (s, 3H), 6.99 (dt, *J* = 8.9, 2.9 Hz, 2H), 7.17-7.21 (m, 1H), 7.27 (td, *J* = 7.7, 1.2 Hz, 1H), 7.41 (dd, *J* = 7.9, 2.0 Hz, 1H), 7.81 (dt, *J* = 8.9, 2.9 Hz, 2H), 8.31 (dd, *J* = 6.6, 0.5 Hz, 1H) ppm. IR (cm<sup>-1</sup>, KBr): 3064, 2984, 1584, 1497, 1446, 1332, 1251, 1204, 1179, 833, 766.

#### *2-(3-methoxyphenyl)-pyridine N-oxide (3c)*. [4]

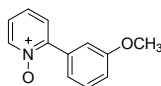

R<sub>f</sub> = 0.6 (AcOEt/Alcohol = 6/1 v/v); White solid; M.p. = 120-122 °C; <sup>1</sup>H NMR (600 MHz, CDCl<sub>3</sub>): δ = 3.85 (s, 3H), 6.99 (ddd, *J* = 8.2, 2.6, 1.0 Hz, 1H), 7.22-7.26 (m, 1H), 7.29-7.34 (m, 2H), 7.38 (t, *J* = 7.7 Hz, 1H), 7.42-7.44 (m, 2H), 8.32 (dd, *J* = 6.5, 0.8 Hz, 1H) ppm. IR (cm<sup>-1</sup>, KBr): 3102, 3057, 2935, 2841, 1608, 1531, 1435, 1243, 830, 761.

#### *2-(2-methoxyphenyl)-pyridine N-oxide (3d)*. [5]

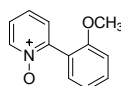

R<sub>f</sub> = 0.5 (AcOEt/Alcohol = 6/1 v/v); White solid; M.p. = 169-171 °C; <sup>1</sup>H NMR (600 MHz, CDCl<sub>3</sub>): δ =

3.82 (s, 3H), 7.01 (d,  $J = 8.3$  Hz, 1H), 7.05 (td,  $J = 7.5, 1.0$  Hz, 1H), 7.23-7.27 (m, 1H), 7.27 (dd,  $J = 7.6, 1.4$  Hz, 1H), 7.34-7.37 (m, 1H), 7.38 (dd,  $J = 7.5, 1.7$  Hz, 1H), 7.43-7.46 (m, 1H), 8.33-8.35 (m, 1H) ppm. IR ( $\text{cm}^{-1}$ , KBr): 3094, 3044, 2961, 2843, 1598, 1487, 1435, 1367, 1243, 961, 827, 733.

**2-(4-methylphenyl)-pyridine N-oxide (3e).** [3, 4, 5, 6]

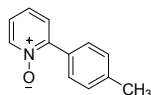

$R_f = 0.6$  (Petroleum ether/AcOEt = 6/1 v/v); Yellowish solid; M.p. = 129-131 °C;  $^1\text{H}$  NMR (600 MHz,  $\text{CDCl}_3$ ):  $\delta = 2.41$  (s, 3H), 7.19-7.23 (m, 1H), 7.28-7.32 (m, 3H), 7.60-7.64 (m, 3H), 7.4 (dd,  $J = 7.9, 2.3$  Hz, 1H), 7.71 (dt,  $J = 8.1, 2.0$  Hz, 2H), 8.32 (dt,  $J = 6.1, 1.0$  Hz, 1H) ppm. IR ( $\text{cm}^{-1}$ , KBr): 3066, 3043, 2915, 1614, 1430, 1240, 1010, 816, 760.

**2-(4-fluorophenyl)-pyridine N-oxide (3f).** [7]

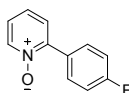

$R_f = 0.6$  (AcOEt/Alcohol = 10/1 v/v); Yellowish solid; M.p. = 161-163 °C;  $^1\text{H}$  NMR (600 MHz,  $\text{CDCl}_3$ ):  $\delta = 7.15$ -7.20 (m, 2H), 7.23-7.26 (m, 1H), 7.30 (td,  $J = 7.8, 1.2$  Hz, 1H), 7.41 (dd,  $J = 7.8, 2.0$  Hz, 1H), 7.83-7.86 (m, 2H), 8.33 (dd,  $J = 6.4, 0.9$  Hz, 1H) ppm. IR ( $\text{cm}^{-1}$ , KBr): 3062, 3040, 2463, 1916, 1597, 1246, 1018, 760, 572.

**2-(3-fluorophenyl)-pyridine N-oxide (3g).**

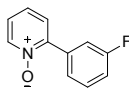

$R_f = 0.6$  (AcOEt /Alcohol = 6/1 v/v); Yellowish solid; M.p. = 106-107 °C;  $^1\text{H}$  NMR (600 MHz,  $\text{CDCl}_3$ ):  $\delta = 7.14$ -7.18 (m, 1H), 7.25-7.29 (m, 1H), 7.31 (td,  $J = 7.7, 1.2$  Hz, 1H), 7.43-7.48 (m, 2H), 7.55-7.58 (m, 1H), 7.61 (dt,  $J = 9.9, 1.7$  Hz, 1H), 8.34 (dd,  $J = 6.4, 0.7$  Hz, 1H) ppm;  $^{13}\text{C}$  NMR (150 MHz,  $\text{CDCl}_3$ ):  $\delta = 119.4, 119.5, 119.7, 127.9, 128.8, 130.2, 132.7$  (d,  $J = 8.6$  Hz), 132.8, 143.5, 164.5 (d,  $J = 244.2$  Hz) ppm; HRMS (ESI,  $m/z$ ): Calcd for  $\text{C}_{11}\text{H}_8\text{FNO}$  [ $\text{M} + \text{H}$ ] $^+$  190.0668, found 190.0662. IR ( $\text{cm}^{-1}$ , KBr): 3074, 3051, 2421, 1603, 1497, 1332, 1263, 1007, 801, 596.

**4-(N-Oxopyridin-2-yl)benzoic acid (3h). CAS:281234-68-2**

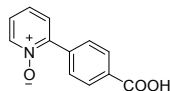

$R_f = 0.2$  (AcOEt); Yellow solid; M.p. = 162-164 °C;  $^1\text{H}$  NMR (400 MHz,  $\text{CDCl}_3$ ):  $\delta = 7.28$ -7.33 (m, 1H), 7.33 (td,  $J = 7.6, 1.3$  Hz, 1H), 7.46 (dd,  $J = 7.8, 2.0$  Hz, 1H), 8.00 (s, 4H), 8.35 (dd,  $J = 6.2, 0.8$  Hz, 1H), 10.8 (s, 1H) ppm. IR ( $\text{cm}^{-1}$ , KBr): 3632, 3103, 3051, 2443, 1597, 1497, 1348, 1203, 819, 796.

**2-(3-nitrophenyl)-pyridine N-oxide (3i). CAS:103985-13-3**

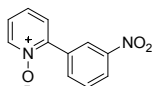

$R_f = 0.4$  (AcOEt/Alcohol = 10/1 v/v); pale yellow solid; M.p. = 175-177 °C;  $^1\text{H NMR}$  (400 MHz,  $\text{CDCl}_3$ ):  $\delta = 7.31$  (td,  $J = 6.4, 2.2$  Hz, 1H), 7.36 (td,  $J = 7.6, 1.4$  Hz, 1H), 7.50 (dd,  $J = 7.8, 2.2$  Hz, 1H), 7.66 (t,  $J = 8.0$  Hz, 1H), 8.25 (dt,  $J = 8.1, 1.3$  Hz, 1H), 8.31 (dq,  $J = 8.3, 1.0$  Hz, 1H), 8.36 (dd,  $J = 6.2, 0.9$  Hz, 1H), 8.66 (t,  $J = 1.9$  Hz, 1H) ppm. IR ( $\text{cm}^{-1}$ , KBr): 3076, 3041, 1580, 1440, 1368, 1237, 1108, 928, 743.

**2-(2-naphthalenyl)-pyridine N-oxide (3j). CAS: 1622867-80-4**

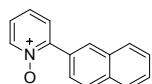

$R_f = 0.4$  (AcOEt/Alcohol = 6/1 v/v); pale solid; M.p. = 139-141 °C;  $^1\text{H NMR}$  (600 MHz,  $\text{CDCl}_3$ ):  $\delta = 7.25$ -7.28 (m, 1H), 7.33 (td,  $J = 7.6, 1.1$  Hz, 1H), 7.50-7.53 (m, 1H), 7.52-7.57 (m, 2H), 7.87 (d,  $J = 7.9$  Hz, 1H), 7.91 (t,  $J = 5.9$  Hz, 1H), 7.93-7.97 (m, 2H), 8.26 (s, 1H), 8.37-8.39 (m, 1H) ppm. IR ( $\text{cm}^{-1}$ , KBr): 3097, 3056, 1607, 1529, 1430, 1368, 1137, 892, 698.

**2-(2-furanyl)-pyridine N-oxide (3k). CAS: 55484-25-8**

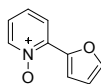

$R_f = 0.4$  (AcOEt); pale yellow solid; M.p. = 94-96 °C;  $^1\text{H NMR}$  (600 MHz,  $\text{CDCl}_3$ ):  $\delta = 6.61$  (q,  $J = 1.7$  Hz, 1H), 7.11 (td,  $J = 7.1, 1.9$  Hz, 1H), 7.29-7.33 (m, 1H), 7.59 (d,  $J = 1.1$  Hz, 1H), 7.93 (dd,  $J = 8.2, 1.9$  Hz, 1H), 8.02 (d,  $J = 3.4$  Hz, 1H), 8.27 (d,  $J = 6.4$  Hz, 1H) ppm. IR ( $\text{cm}^{-1}$ , KBr): 3075, 1594, 1498, 1423, 1276, 1258, 898, 841, 591.

**2-(3-thienyl)-pyridine N-oxide (3l). CAS: 92928-98-8**

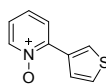

$R_f = 0.4$  (AcOEt); pale yellow solid; M.p. = 118-119 °C;  $^1\text{H NMR}$  (600 MHz,  $\text{CDCl}_3$ ):  $\delta = 7.15$ -7.18 (m, 1H), 7.28-7.32 (m, 1H), 7.40 (dd,  $J = 5.2, 3.1$  Hz, 1H), 7.64 (dd,  $J = 5.2, 1.3$  Hz, 1H), 7.68 (dd,  $J = 8.1, 1.9$  Hz, 1H), 8.33 (dd,  $J = 6.2, 0.8$  Hz, 1H), 8.86 (dd,  $J = 3.2, 1.3$  Hz, 1H) ppm. IR ( $\text{cm}^{-1}$ , KBr): 3044, 1563, 1477, 1450, 1291, 1197, 898, 872, 633.

**2-(2-thienyl)-pyridine N-oxide (3m).<sup>[8]</sup>**

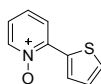

$R_f = 0.4$  (AcOEt); Pale solid; M.p. = 143-146 °C;  $^1\text{H NMR}$  (600 MHz,  $\text{CDCl}_3$ ):  $\delta = 7.11$  (td,  $J = 6.9, 1.9$  Hz, 1H), 7.21-7.23 (m, 1H), 7.30-7.34 (m, 1H), 7.57 (dd,  $J = 5.2, 1.1$  Hz, 1H), 7.86 (dd,  $J = 4.0, 1.1$  Hz, 1H), 7.93 (td,  $J = 8.3, 1.8$  Hz, 1H), 8.31 (dd,  $J = 6.8, 0.8$  Hz, 1H) ppm. IR ( $\text{cm}^{-1}$ , KBr): 3059, 1544, 1498, 1423, 1276, 1258, 898, 841, 591.

**2-(5-methyl-2-thienyl)-pyridine N-oxide (3n).** [2, 9]

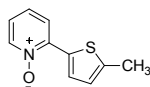

R<sub>f</sub> = 0.4 (AcOEt); Yellow solid; M.p. = 140-142 °C; <sup>1</sup>H NMR (600 MHz, CDCl<sub>3</sub>): δ = 2.55 (s, 3H), 6.88 (dd, *J* = 4.0, 1.0 Hz, 1H), 7.06 (td, *J* = 7.1, 1.9 Hz, 1H), 7.28 (dd, *J* = 7.6, 1.3 Hz, 1H), 7.67 (d, *J* = 4.0 Hz, 1H), 7.85 (dd, *J* = 8.3, 1.7 Hz, 1H), 8.27-8.30 (m, 1H) ppm. IR (cm<sup>-1</sup>, KBr): 3034, 3017, 2986, 1599, 1509, 1479, 1329, 1276, 1128, 935, 698.

**2-(5-bromo-2-thienyl)-pyridine N-oxide (3o).**

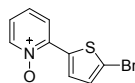

R<sub>f</sub> = 0.4 (AcOEt); pale yellow solid; M.p. = 164-166 °C; <sup>1</sup>H NMR (600 MHz, CDCl<sub>3</sub>): δ = 7.14 (dd, *J* = 7.2, 1.8 Hz, 1H), 7.18 (d, *J* = 4.3 Hz, 1H), 7.33-7.36 (m, 1H), 7.59 (d, *J* = 4.3 Hz, 1H), 7.87 (dd, *J* = 8.3, 1.7 Hz, 1H), 8.30 (d, *J* = 6.9 Hz, 1H) ppm; <sup>13</sup>C NMR (100 MHz, CDCl<sub>3</sub>): δ = 119.9, 121.3, 122.3, 126.1, 126.5, 128.8, 132.4, 139.1, 142.5 ppm; HRMS (ESI, *m/z*): Calcd for C<sub>9</sub>H<sub>6</sub>BrNOS [M + H]<sup>+</sup> 255.9432, found 255.9442. IR (cm<sup>-1</sup>, KBr): 3071, 1603, 1508, 1329, 1307, 1258, 1124, 1085, 876, 691.

**2-(2,5-dimethyl-3-thienyl)-pyridine N-oxide (3p).**

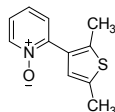

R<sub>f</sub> = 0.4 (AcOEt/Alcohol = 6/1 v/v); pale yellow liquid; <sup>1</sup>H NMR (600 MHz, CDCl<sub>3</sub>): δ = 2.38 (s, 3H), 2.42 (s, 3H), 6.89 (d, *J* = 0.6 Hz, 1H), 7.18 (td, *J* = 6.7, 2.5 Hz, 1H), 7.23 (d, *J* = 8.1 Hz, 1H), 7.26-7.29 (m, 1H), 8.31 (d, *J* = 6.4 Hz, 1H) ppm; <sup>13</sup>C NMR (100 MHz, CDCl<sub>3</sub>): δ = 14.4, 15.2, 124.2, 124.9, 126.4, 128.0, 129.1, 136.1, 138.0, 140.5, 146.0 ppm; HRMS (ESI, *m/z*): Calcd for C<sub>11</sub>H<sub>12</sub>NOS [M + H]<sup>+</sup> 206.0640, found 206.0643. IR (cm<sup>-1</sup>, KBr): 3077, 3049, 2989, 2908, 1583, 1494, 1371, 1267, 1209, 1107, 877, 806.

**2-(2-benzofuranyl)-pyridine N-oxide (3q).** [2]

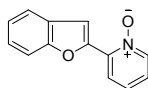

R<sub>f</sub> = 0.5 (AcOEt); Pale yellow solid; M.p. = 139-141 °C; <sup>1</sup>H NMR (600 MHz, CDCl<sub>3</sub>): δ = 7.19-7.22 (m, 1H), 7.28-7.31 (m, 1H), 7.35 (dd, *J* = 8.2, 0.9 Hz, 1H), 7.37-7.42 (m, 1H), 7.52 (dd, *J* = 8.3, 0.7 Hz, 1H), 7.71-7.74 (m, 1H), 8.15 (dd, *J* = 8.2, 2.0 Hz, 1H), 8.34-8.36 (m, 1H), 8.46 (d, *J* = 0.9 Hz, 1H) ppm. IR (cm<sup>-1</sup>, KBr): 3098, 3059, 1558, 1494, 1307, 1298, 1109, 1047, 897, 791.

**4-nitro-2-phenylpyridine N-oxide (3r).** [10]

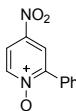



$R_f = 0.5$  (AcOEt); Pale yellow solid; M.p. = 135-136 °C;  $^1\text{H NMR}$  (600 MHz,  $\text{CDCl}_3$ ):  $\delta = 7.52$ -7.54 (m, 3H), 7.80-7.82 (m, 2H), 8.02 (dd,  $J = 7.1, 3.2$  Hz, 1H), 8.28 (d,  $J = 3.2$  Hz, 1H), 8.36 (d,  $J = 7.2$  Hz, 1H) ppm. IR ( $\text{cm}^{-1}$ , KBr): 3041, 1597, 1508, 1339, 1284, 1231, 1114, 895, 724.

**2-chloro-6-phenylpyridine N-oxide (3s). CAS: 119492-88-5**

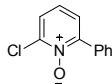

$R_f = 0.3$  (Petroleum ether/AcOEt = 3/1 v/v); Pale yellow solid; M.p. = 141-142 °C;  $^1\text{H NMR}$  (600 MHz,  $\text{CDCl}_3$ ):  $\delta = 7.20$  (t,  $J = 8.0$  Hz, 1H), 7.35 (dd,  $J = 7.9, 2.0$  Hz, 1H), 7.45-7.50 (m, 4H), 7.78-7.81 (m, 2H) ppm. IR ( $\text{cm}^{-1}$ , KBr): 3048, 1610, 1508, 1497, 1328, 1263, 1209, 1095, 747, 678.

**4-methyl-2-phenylpyridine N-oxide (3t). CAS: 80635-42-3**

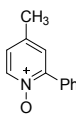

$R_f = 0.2$  (AcOEt /Alcohol = 6/1 v/v); Pale yellow liquid;  $^1\text{H NMR}$  (400 MHz,  $\text{CDCl}_3$ ):  $\delta = 2.39$  (s, 3H), 7.04 (dd,  $J = 6.5, 2.3$  Hz, 1H), 7.31 (t,  $J = 8.1$  Hz, 1H), 7.45-7.50 (m, 3H), 7.78-7.84 (m, 2H), 8.27 (d,  $J = 6.7$  Hz, 1H) ppm. IR ( $\text{cm}^{-1}$ , KBr): 3072, 2978, 1598, 1541, 1469, 1382, 1294, 1098, 814, 716.

**5-methyl-2-phenylpyridine N-oxide (3u). [6]**

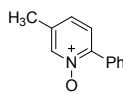

$R_f = 0.3$  (AcOEt /Alcohol = 10/1 v/v); Pale solid; M.p. = 168-169 °C;  $^1\text{H NMR}$  (400 MHz,  $\text{CDCl}_3$ ):  $\delta = 2.33$  (s, 3H), 7.12-7.15 (m, 1H), 7.30 (d,  $J = 8.0$  Hz, 1H), 7.42-7.50 (m, 3H), 7.78 (dd,  $J = 8.3, 1.7$  Hz, 2H), 8.20 (s, 1H) ppm. IR ( $\text{cm}^{-1}$ , KBr): 3048, 2967, 1603, 1523, 1481, 1378, 1321, 1245, 1103, 829, 732, 699.

**6-methyl-2-phenylpyridine N-oxide (3v). [3, 6, 8]**

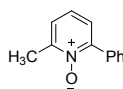

$R_f = 0.5$  (Petroleum ether/AcOEt = 2/1 v/v); Pale solid; M.p. = 118-119 °C;  $^1\text{H NMR}$  (600 MHz,  $\text{CDCl}_3$ ):  $\delta = 2.58$  (s, 3H), 7.18 (t,  $J = 7.7$  Hz, 1H), 7.24 (d,  $J = 2.2$  Hz, 1H), 7.30 (dd,  $J = 8.0, 2.2$  Hz, 1H), 7.42-7.48 (m, 3H), 7.77 (dd,  $J = 8.3, 1.6$  Hz, 2H) ppm. IR ( $\text{cm}^{-1}$ , KBr): 3059, 3015, 2946, 2889, 1597, 1523, 1470, 1369, 1315, 1287, 1103, 799, 693.

**4-methoxy-2-phenylpyridine N-oxide (3w).**

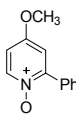

$R_f = 0.5$  (AcOEt/Alcohol = 4/1 v/v); Pale yellow liquid;  $^1\text{H NMR}$  (400 MHz,  $\text{CDCl}_3$ ):  $\delta = 3.87$  (s, 3H), 6.78 (q,  $J = 3.5$  Hz, 1H), 6.92 (d,  $J = 3.5$  Hz, 1H), 7.44-7.50 (m, 3H), 7.80 (dd,  $J = 9.7, 1.9$  Hz, 2H),

8.23 (d,  $J = 7.3$  Hz, 1H) ppm;  $^{13}\text{C}$  NMR (100 MHz,  $\text{CDCl}_3$ ):  $\delta = 56.1, 110.9, 112.4, 128.3, 129.3, 129.7, 132.8, 141.2, 149.8, 157.6$  ppm; HRMS (ESI,  $m/z$ ): Calcd for  $\text{C}_{12}\text{H}_{11}\text{NO}_2[\text{M} + \text{H}]^+$  202.0868, found 202.0867. IR ( $\text{cm}^{-1}$ , KBr): 3074, 2954, 2883, 1590, 1514, 1473, 1382, 1342, 1291, 1249, 1073, 832, 719.

**3-methyl-4-nitro-6-phenylpyridine N-oxide (3x). CAS:1344663-62-2**

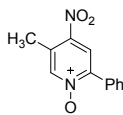

$R_f = 0.3$  (Petroleum ether/AcOEt = 3/1 v/v); Yellow solid; M.p. = 169-170 °C;  $^1\text{H}$  NMR (400 MHz,  $\text{CDCl}_3$ ):  $\delta = 2.63$  (d,  $J = 0.5$  Hz, 3H), 7.50-7.53 (m, 3H), 7.78-7.81 (m, 2H), 8.20 (s, 1H), 8.26 (s, 1H) ppm. IR ( $\text{cm}^{-1}$ , KBr): 3082, 1590, 1514, 1346, 1295, 1249, 1073, 827, 743.

## V. References

- [1] (a) Cho, S. H.; Hwang, S. J.; Chang, S. *J. Am. Chem. Soc.* **2008**, *130*, 9254. (b) Kokatla, H. P.; Thomson, P. F.; Bae, S.; Doddi, V. R.; Lakshman, M. K., *J. Org. Chem.* **2011**, *76*, 7842–7848. (c) Cuny, G. D.; Hauske, J. R.; Hoemann, M. Z.; Chopra, I. Preparation of quinolinylindoles as antimicrobial agents. US6376670B1, **2002**.
- [2] Liu, W.; Yu, X.; Li, Y.; Kuang, C. *Chem. Commun.*, **2014**, *50*, 9291–9294.
- [3] Do, H. Q. R.; Khan, M. K.; Daugulis, O. *J. Am. Chem. Soc.* **2008**, *130*, 15185–15192.
- [4] Ackermann, L.; Fenner, S. *Chem. Commun.* **2011**, *47*, 430–432.
- [5] Campeau, L.-C.; Rousseaux, S.; Fagnou, K. *J. Am. Chem. Soc.* **2005**, *127*, 18020–18021.
- [6] Liu, C., Zhang, S.-K., Zhang, Y.-X., Jin, Z.-L. *Chinese Chem. Lett.* **2015**, *26*, 55–57.
- [7] Ackermann, L.; Fenner, S. *Chem. Commun.*, 2011, **47**, 430–432.
- [8] Zhang, F., Zhang, S., Duan, X., -F, *Org. Lett.* **2012**, *14*, 5618–5620.
- [9] Xi, P.; Yang, F.; Qin, S.; Zhao, D.; Lan, J.; Gao, G.; Hu, C.; You, J. *J. Am. Chem. Soc.* **2010**, *132*, 1822–1824.
- [10] Zhang, F.; Duan, X.-F. *Org. Lett.* **2011**, *13*, 6102–6105.

#### IV. <sup>1</sup>HNMR and <sup>13</sup>CNMR spectra

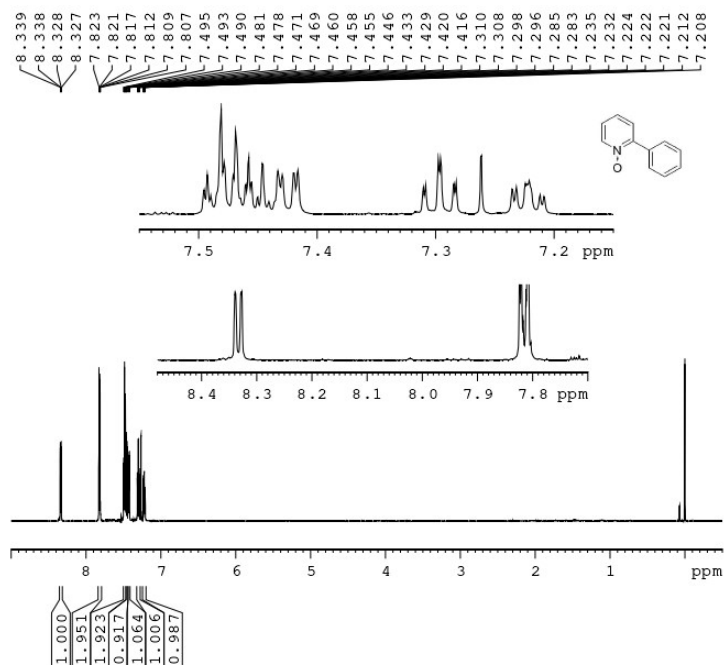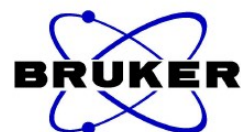

```

NAME      20140815wangmengge
EXPNO     2
PROCNO    1
Date_     20140815
Time      15.39
INSTRUM   spect
PROBHD    5 mm PABBO BB-
PULPROG   zg30
TD        65536
SOLVENT   CDC13
NS        13
DS        2
SWH       12335.526 Hz
FIDRES    0.188225 Hz
AQ        2.6564426 sec
RG        128
DW        40.533 usec
DE        6.50 usec
TE        301.4 K
D1        1.00000000 sec
    
```

```

===== CHANNEL f1 =====
NUC1      1H
P1        12.60 usec
SI        32768
SF        600.1300157 MHz
WDW       GM
SSB       0
LB        -0.10 Hz
GB        0.1
PC        1.00
    
```

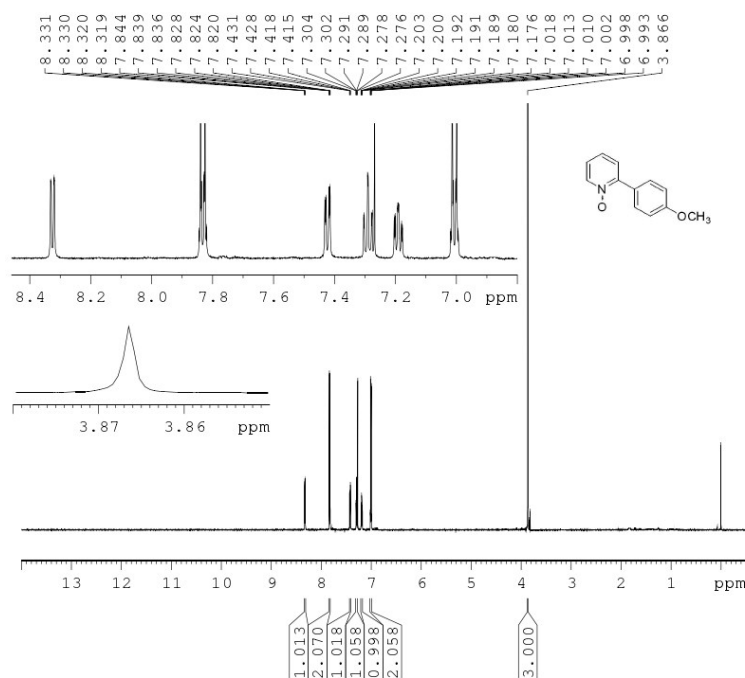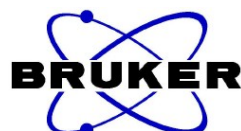

```

NAME      20141212zhaojinjin
EXPNO     1
PROCNO    1
Date_     20141212
Time      10.11
INSTRUM   spect
PROBHD    5 mm PADUL 13C
PULPROG   zg30
TD        65536
SOLVENT   CDC13
NS        4
DS        2
SWH       12335.526 Hz
FIDRES    0.188225 Hz
AQ        2.6564426 sec
RG        203
DW        40.533 usec
DE        6.50 usec
TE        291.4 K
D1        1.00000000 sec
    
```

```

===== CHANNEL f1 =====
NUC1      1H
P1        14.00 usec
SI        32768
SF        600.1300130 MHz
WDW       EM
SSB       0
LB        -0.10 Hz
GB        0
PC        1.00
    
```

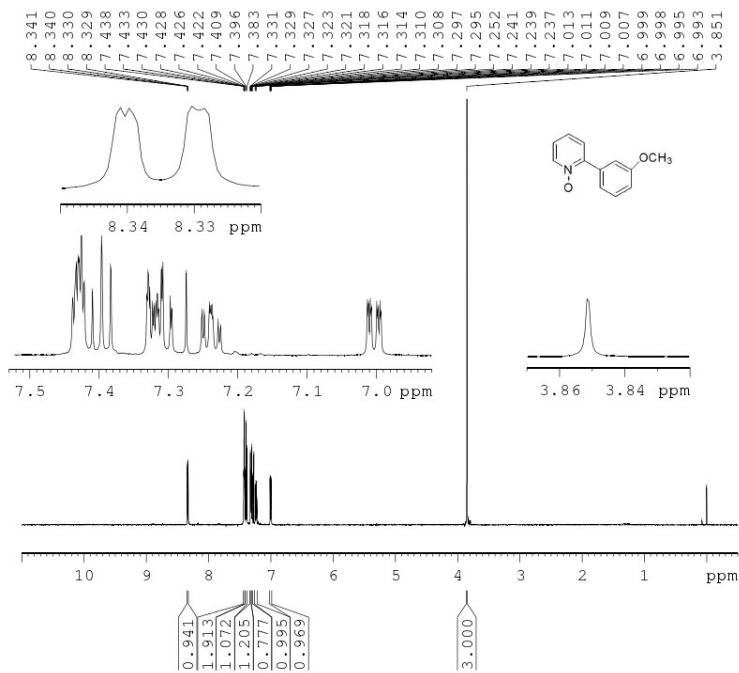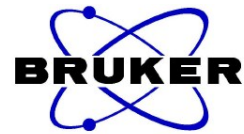

NAME 20141212zhaojinjin  
 EXPNO 10  
 PROCNO 1  
 Date\_ 20141212  
 Time 10.47  
 INSTRUM spect  
 PROBHD 5 mm PADUL 13C  
 PULPROG zg30  
 TD 65536  
 SOLVENT CDC13  
 NS 4  
 DS 2  
 SWH 12335.526 Hz  
 FIDRES 0.188225 Hz  
 AQ 2.6564426 sec  
 RG 203  
 DW 40.533 usec  
 DE 6.50 usec  
 TE 290.7 K  
 D1 1.00000000 sec

==== CHANNEL f1 =====  
 NUC1 1H  
 P1 14.00 usec  
 SI 32768  
 SF 600.130092 MHz  
 WDW EM  
 SSB 0  
 LB -0.10 Hz  
 GB 0  
 PC 1.00

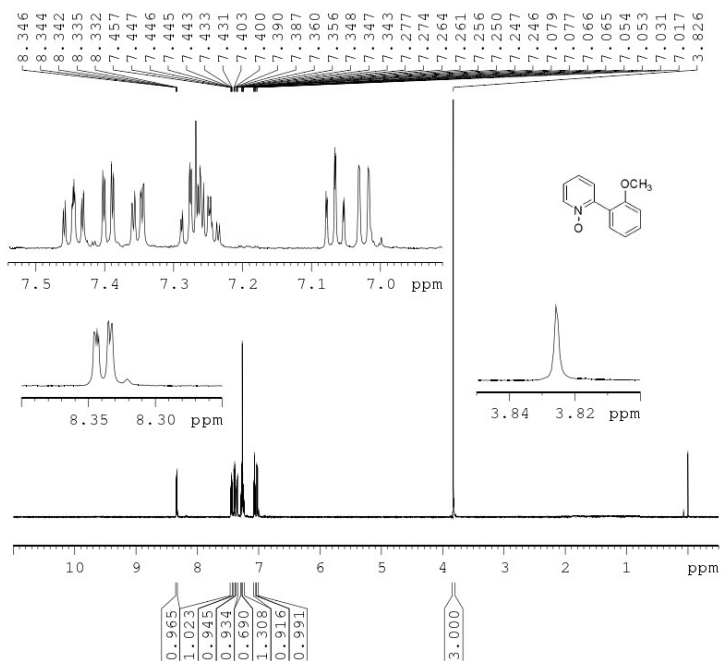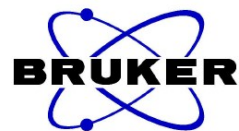

NAME 20141212zhaojinjin  
 EXPNO 3  
 PROCNO 1  
 Date\_ 20141212  
 Time 10.20  
 INSTRUM spect  
 PROBHD 5 mm PADUL 13C  
 PULPROG zg30  
 TD 65536  
 SOLVENT CDC13  
 NS 4  
 DS 2  
 SWH 12335.526 Hz  
 FIDRES 0.188225 Hz  
 AQ 2.6564426 sec  
 RG 203  
 DW 40.533 usec  
 DE 6.50 usec  
 TE 291.0 K  
 D1 1.00000000 sec

==== CHANNEL f1 =====  
 NUC1 1H  
 P1 14.00 usec  
 SI 32768  
 SF 600.1300134 MHz  
 WDW EM  
 SSB 0  
 LB -0.10 Hz  
 GB 0  
 PC 1.00

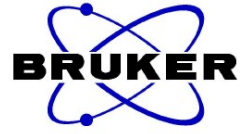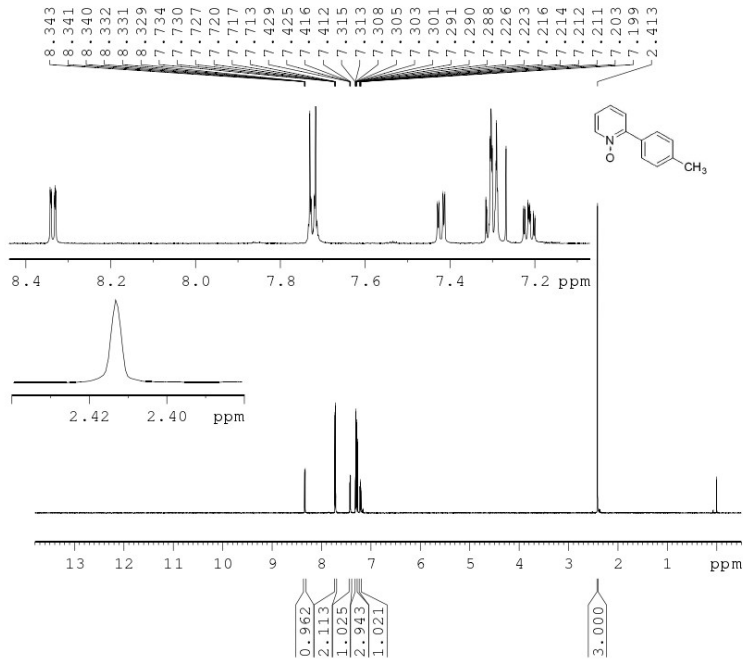

NAME 20141219baiyana  
EXPNO 8  
PROCNO 1  
Date\_ 20141219  
Time 10.36  
INSTRUM spect  
PROBHD 5 mm PADUL 13C  
PULPROG zg30  
TD 65536  
SOLVENT CDCl3  
NS 4  
DS 2  
SWH 12335.526 Hz  
FIDRES 0.188225 Hz  
AQ 2.6564426 sec  
RG 203  
DW 40.533 usec  
DE 6.50 usec  
TE 289.7 K  
D1 1.00000000 sec

==== CHANNEL f1 =====  
NUC1 1H  
P1 14.00 usec  
SI 32768  
SF 600.1300130 MHz  
WDW EM  
SSB 0  
LB -0.10 Hz  
GB 0  
PC 1.00

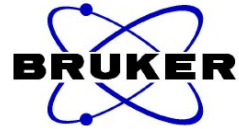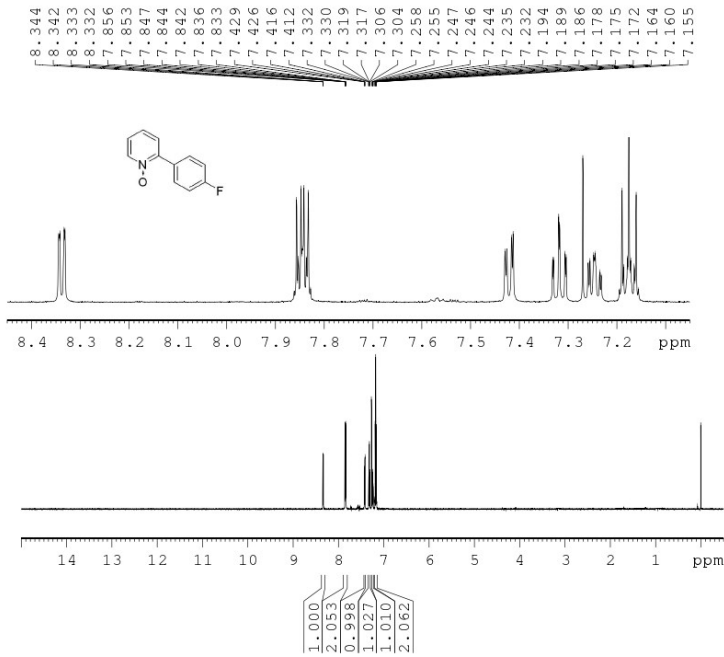

NAME 20141212zhaojinjin  
EXPNO 2  
PROCNO 1  
Date\_ 20141212  
Time 10.16  
INSTRUM spect  
PROBHD 5 mm PADUL 13C  
PULPROG zg30  
TD 65536  
SOLVENT CDCl3  
NS 4  
DS 2  
SWH 12335.526 Hz  
FIDRES 0.188225 Hz  
AQ 2.6564426 sec  
RG 203  
DW 40.533 usec  
DE 6.50 usec  
TE 291.1 K  
D1 1.00000000 sec

==== CHANNEL f1 =====  
NUC1 1H  
P1 14.00 usec  
SI 32768  
SF 600.1300123 MHz  
WDW EM  
SSB 0  
LB -0.10 Hz  
GB 0  
PC 1.00

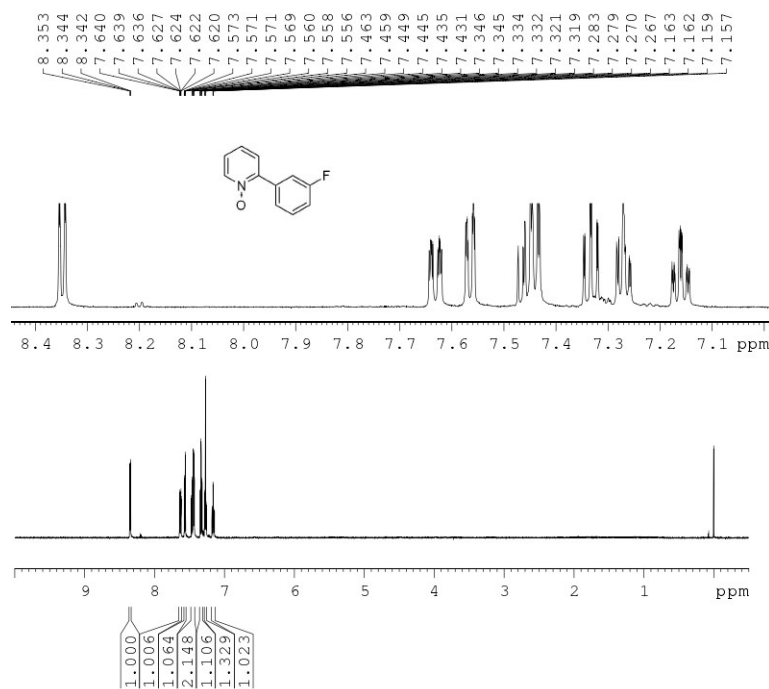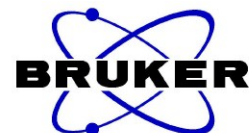

```

NAME      20150403zhourui
EXPNO     2
PROCNO    1
Date_     20150403
Time      9.57
INSTRUM   spect
PROBHD    5 mm PADUL 13C
PULPROG   zg30
TD         65536
SOLVENT   CDCl3
NS         4
DS         2
SWH        12335.526 Hz
FIDRES     0.188225 Hz
AQ         2.6564426 sec
RG         203
DW         40.533 usec
DE         6.50 usec
TE         294.2 K
D1         1.00000000 sec
  
```

```

===== CHANNEL f1 =====
NUC1      1H
P1        14.00 usec
SI        32768
SF        600.1300116 MHz
WDW       EM
SSB       0
LB        -0.10 Hz
GB        0
PC        1.00
  
```

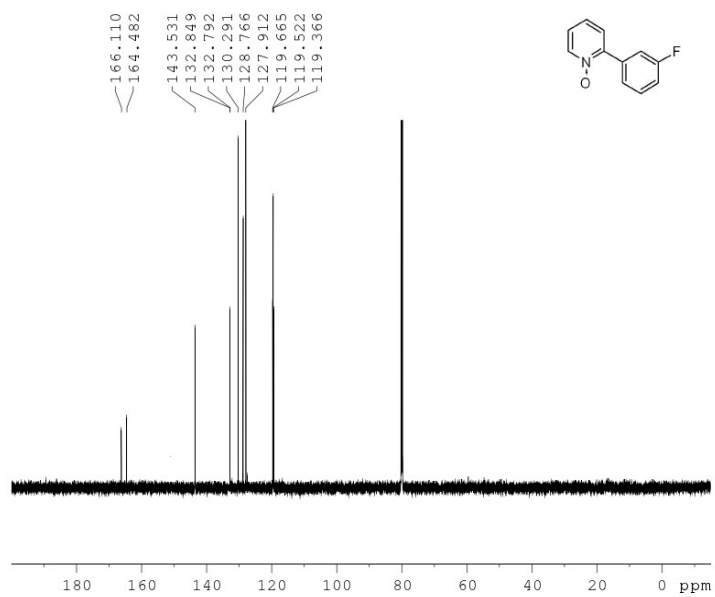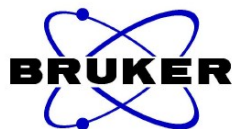

```

NAME      c20150408hufei
EXPNO     3
PROCNO    1
Date_     20150408
Time      15.01
INSTRUM   spect
PROBHD    5 mm PADUL 13C
PULPROG   zgpg30
TD         65536
SOLVENT   CDCl3
NS         765
DS         2
SWH        36057.691 Hz
FIDRES     0.550197 Hz
AQ         0.9088159 sec
RG         203
DW         13.867 usec
DE         6.50 usec
TE         293.8 K
D1         1.00000000 sec
D11        0.03000000 sec
  
```

```

===== CHANNEL f1 =====
NUC1      13C
P1        9.80 usec
SI        32768
SF        150.9023724 MHz
WDW       EM
SSB       0
LB        1.00 Hz
GB        0
PC        1.40
  
```

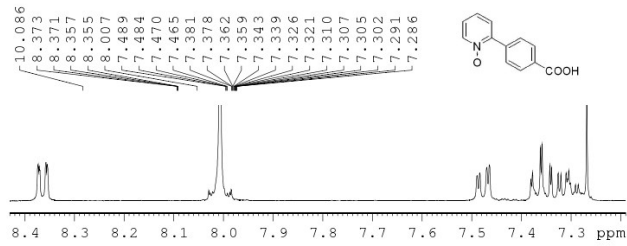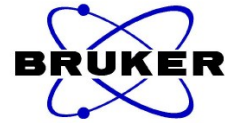

```

NAME      2015-09-01 tylg-chh
EXPNO     10
PROCNO    1
Date_     20150901
Time      10.43
INSTRUM   spect
PROBHD    5 mm PABBO BB/
PULPROG   zg30
TD        65536
SOLVENT   CDC13
NS        16
DS        2
SWH       8012.820 Hz
FIDRES    0.122266 Hz
AQ        4.0894966 sec
RG        87.46
DW        62.400 usec
DE        6.50 usec
TE        296.5 K
D1        1.00000000 sec
TD0       1

```

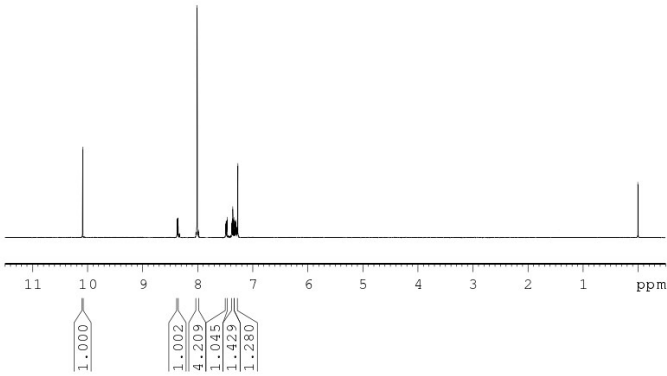

```

===== CHANNEL f1 =====
SFO1     400.1324710 MHz
NUC1     1H
P1       9.70 usec
SI       65536
SF       400.1300067 MHz
WDW      EM
SSB      0
LB       0.30 Hz
GB       0
PC       1.00

```

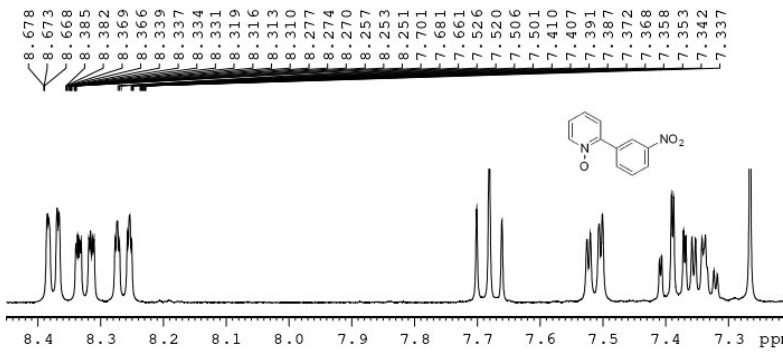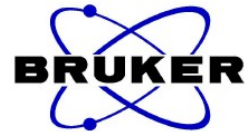

```

NAME      2015-04-20 tylg-huf
EXPNO     10
PROCNO    1
Date_     20150420
Time      10.35
INSTRUM   spect
PROBHD    5 mm PABBO BB/
PULPROG   zg30
TD        65536
SOLVENT   CDC13
NS        16
DS        2
SWH       8012.820 Hz
FIDRES    0.122266 Hz
AQ        4.0894966 sec
RG        87.46
DW        62.400 usec
DE        6.50 usec
TE        294.3 K
D1        1.00000000 sec
TD0       1

```

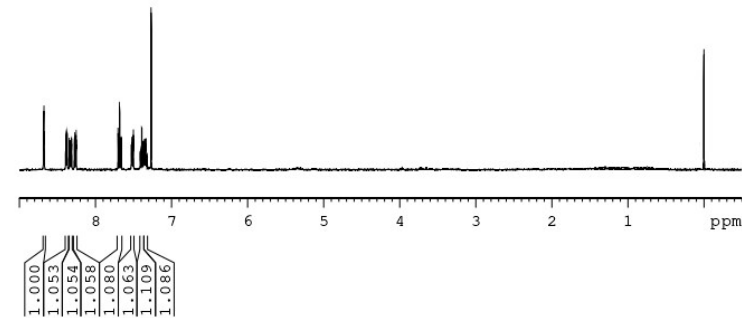

```

===== CHANNEL f1 =====
SFO1     400.1324710 MHz
NUC1     1H
P1       9.70 usec
SI       65536
SF       400.1300076 MHz
WDW      EM
SSB      0
LB       0.30 Hz
GB       0
PC       1.00

```

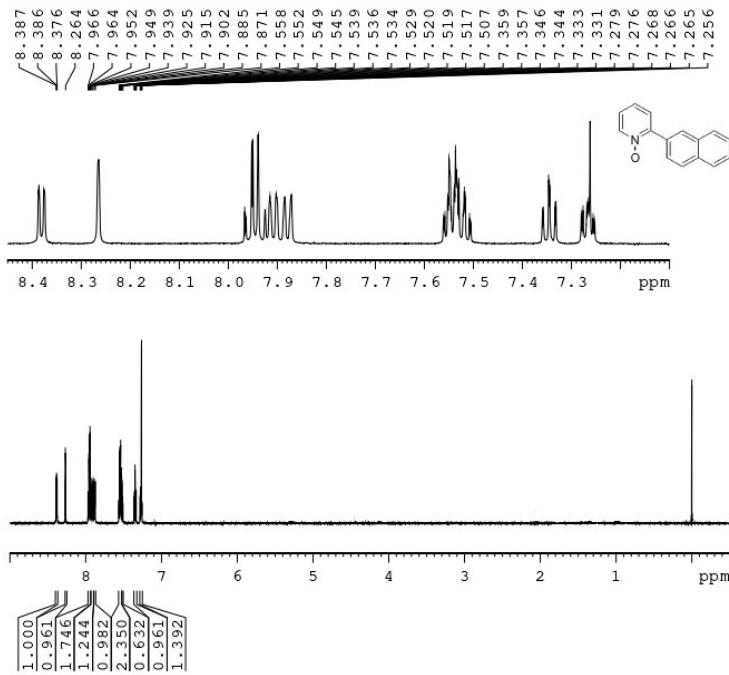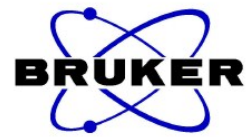

```

NAME      20150119zhaojinjin
EXPNO     5
PROCNO    1
Date_     20150119
Time      15.15
INSTRUM   spect
PROBHD    5 mm PADUL 13C
PULPROG   zg30
TD         65536
SOLVENT   CDCl3
NS         4
DS         2
SWH       12335.526 Hz
FIDRES    0.188225 Hz
AQ        2.6564426 sec
RG         203
DW        40.533 usec
DE        6.50 usec
TE        293.4 K
D1        1.00000000 sec
  
```

```

===== CHANNEL f1 =====
NUC1      1H
P1        14.00 usec
SI        32768
SF        600.1300167 MHz
WDW       EM
SSB       0
LB        -0.10 Hz
GB        0
PC        1.00
  
```

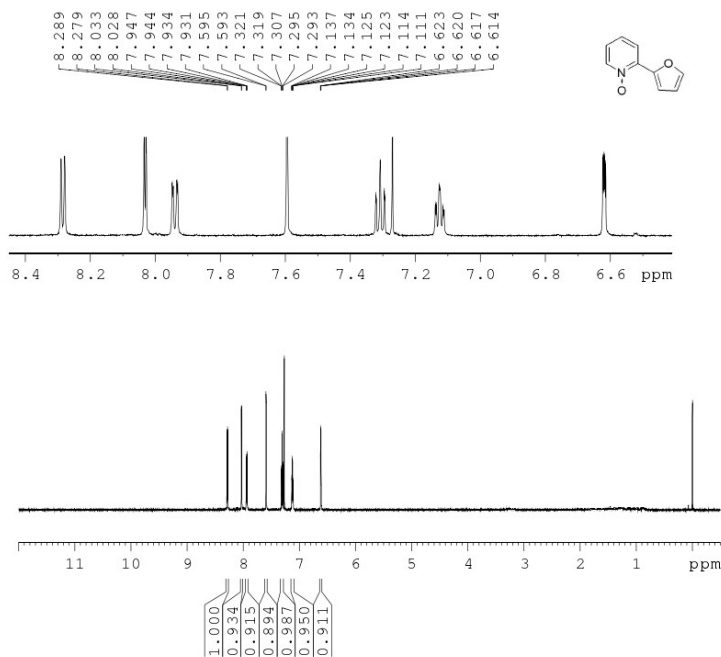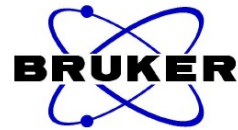

```

NAME      20150113zhaojinjin
EXPNO     4
PROCNO    1
Date_     20150113
Time      15.21
INSTRUM   spect
PROBHD    5 mm PADUL 13C
PULPROG   zg30
TD         65536
SOLVENT   CDCl3
NS         4
DS         2
SWH       12335.526 Hz
FIDRES    0.188225 Hz
AQ        2.6564426 sec
RG         181
DW        40.533 usec
DE        6.50 usec
TE        293.4 K
D1        1.00000000 sec
  
```

```

===== CHANNEL f1 =====
NUC1      1H
P1        14.00 usec
SI        32768
SF        600.1300119 MHz
WDW       EM
SSB       0
LB        -0.10 Hz
GB        0
PC        1.00
  
```



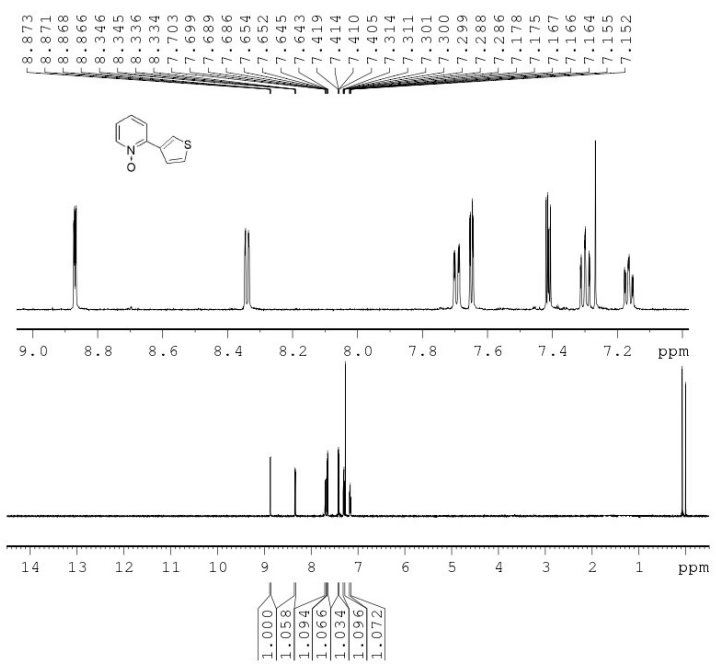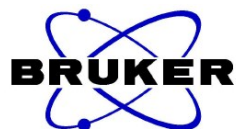

```

NAME      20150126zhaojinjin
EXPNO     7
PROCNO    1
Date_     20150126
Time      15.37
INSTRUM   spect
PROBHD    5 mm PADUL 13C
PULPROG   zg30
TD         65536
SOLVENT   CDCl3
NS         4
DS         2
SWH        12335.526 Hz
FIDRES     0.188225 Hz
AQ         2.6564426 sec
RG         203
DW         40.533 usec
DE         6.50 usec
TE         287.6 K
D1         1.00000000 sec
  
```

```

===== CHANNEL f1 =====
NUC1      1H
P1        14.00 usec
SI        32768
SF        600.1300131 MHz
WDW       EM
SSB       0
LB        -0.10 Hz
GB        0
PC        1.00
  
```

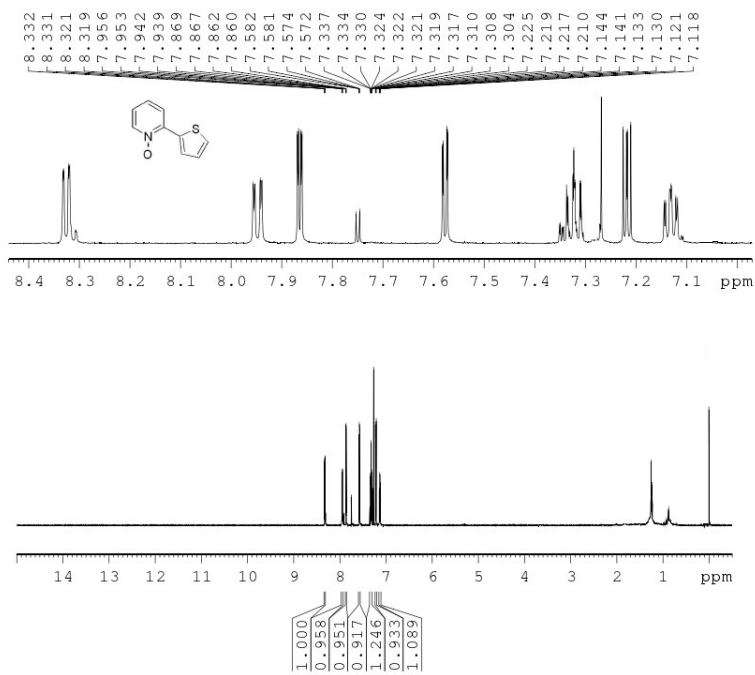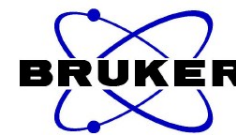

```

NAME      20150113zhaojinjin
EXPNO     10
PROCNO    1
Date_     20150113
Time      15.44
INSTRUM   spect
PROBHD    5 mm PADUL 13C
PULPROG   zg30
TD         65536
SOLVENT   CDCl3
NS         4
DS         2
SWH        12335.526 Hz
FIDRES     0.188225 Hz
AQ         2.6564426 sec
RG         144
DW         40.533 usec
DE         6.50 usec
TE         293.0 K
D1         1.00000000 sec
  
```

```

===== CHANNEL f1 =====
NUC1      1H
P1        14.00 usec
SI        32768
SF        600.1300126 MHz
WDW       EM
SSB       0
LB        -0.10 Hz
GB        0
PC        1.00
  
```

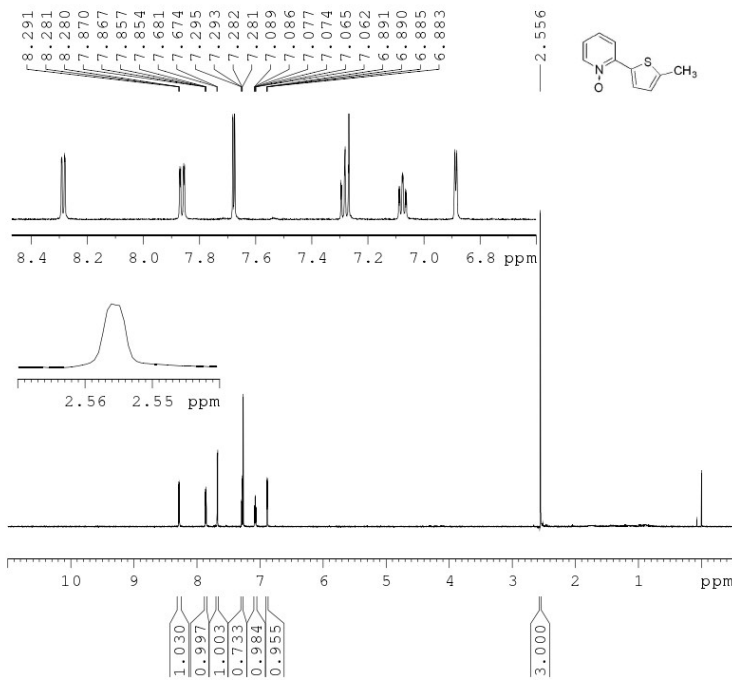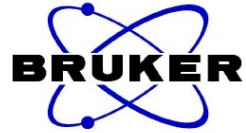

```

NAME      20150113zhaojinjin
EXPNO     5
PROCNO    1
Date_     20150113
Time      15.25
INSTRUM   spect
PROBHD    5 mm PADUL 13C
PULPROG   zg30
TD         65536
SOLVENT   CDC13
NS         4
DS         2
SWH       12335.526 Hz
FIDRES    0.188225 Hz
AQ         2.6564426 sec
RG         181
DW         40.533 usec
DE         6.50 usec
TE         293.2 K
D1         1.0000000 sec

```

```

===== CHANNEL f1 =====
NUC1      1H
P1        14.00 usec
SI        32768
SF        600.1300134 MHz
WDW       EM
SSB       0
LB        -0.10 Hz
GB        0
PC        1.00

```

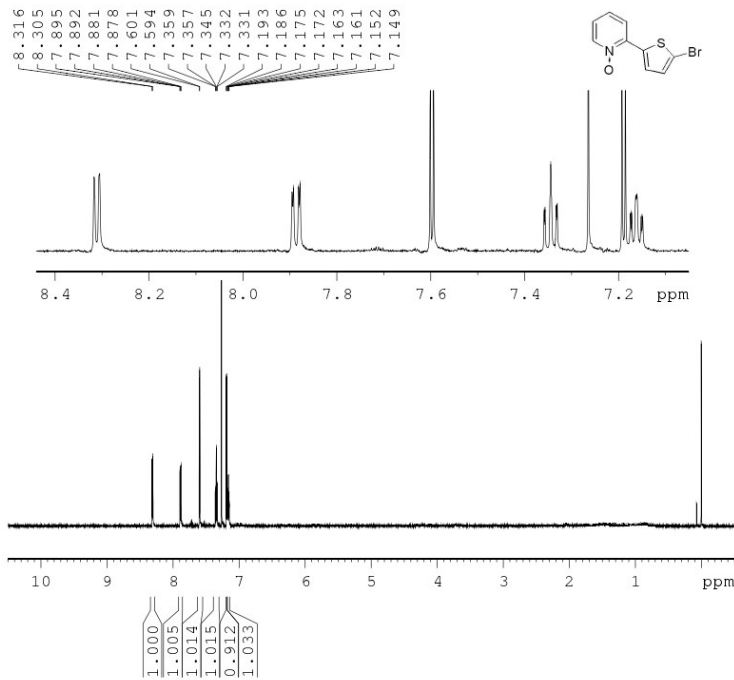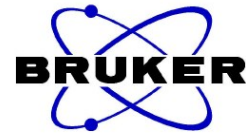

```

NAME      20150113zhaojinjin
EXPNO     9
PROCNO    1
Date_     20150113
Time      15.40
INSTRUM   spect
PROBHD    5 mm PADUL 13C
PULPROG   zg30
TD         65536
SOLVENT   CDC13
NS         4
DS         2
SWH       12335.526 Hz
FIDRES    0.188225 Hz
AQ         2.6564426 sec
RG         203
DW         40.533 usec
DE         6.50 usec
TE         293.0 K
D1         1.0000000 sec

```

```

===== CHANNEL f1 =====
NUC1      1H
P1        14.00 usec
SI        32768
SF        600.1300150 MHz
WDW       EM
SSB       0
LB        -0.10 Hz
GB        0
PC        1.00

```

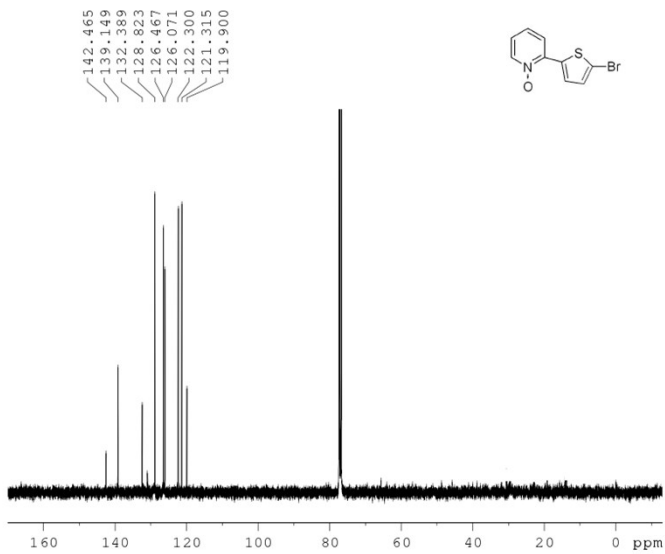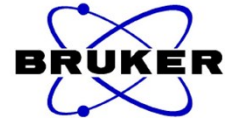

```

NAME      2015-04-23 tylg-huf
EXPNO     10
PROCNO    1
Date_     20150423
Time      16.28
INSTRUM   spect
PROBHD    5 mm PABBO BB/
PULPROG   zgpg30
TD        65536
SOLVENT   CDCl3
NS        1024
DS        4
SWH       24038.461 Hz
FIDRES    0.366798 Hz
AQ        1.3631988 sec
RG        123.61
DW        20.800 usec
DE        6.50 usec
TE        297.6 K
D1        2.00000000 sec
D11       0.03000000 sec
TD0       1
  
```

```

===== CHANNEL f1 =====
SFO1     100.6228293 MHz
NUC1     13C
P1       9.50 usec
SI       32768
SF       100.6127690 MHz
WDW      EM
SSB      0
LB       1.00 Hz
GB       0
PC       1.40
  
```

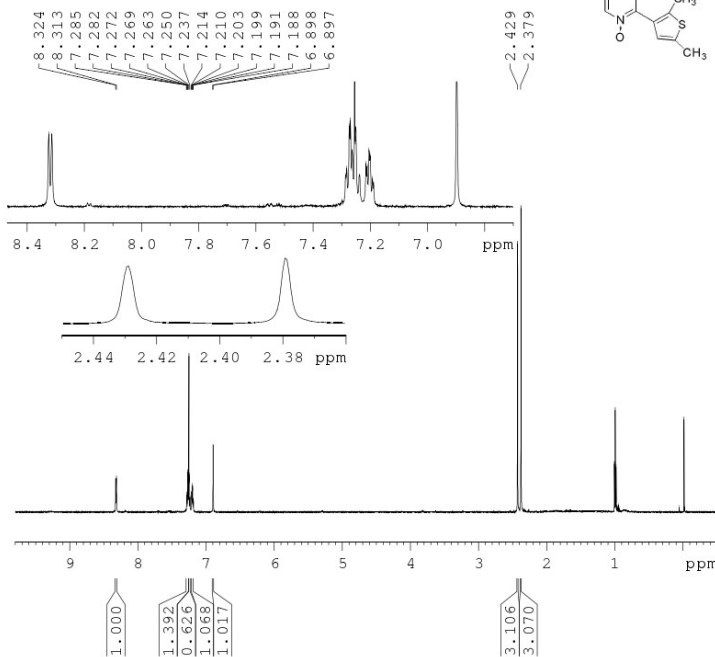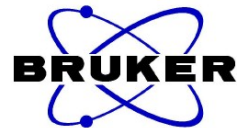

```

NAME      20150119zhaojinjin
EXPNO     6
PROCNO    1
Date_     20150119
Time      15.19
INSTRUM   spect
PROBHD    5 mm PADUL 13C
PULPROG   zg30
TD        65536
SOLVENT   CDCl3
NS        4
DS        2
SWH       12335.526 Hz
FIDRES    0.188225 Hz
AQ        2.6564426 sec
RG        203
DW        40.533 usec
DE        6.50 usec
TE        293.4 K
D1        1.00000000 sec
  
```

```

===== CHANNEL f1 =====
NUC1     1H
P1       14.00 usec
SI       32768
SF       600.1300213 MHz
WDW      EM
SSB      0
LB       -0.10 Hz
GB       0
PC       1.00
  
```

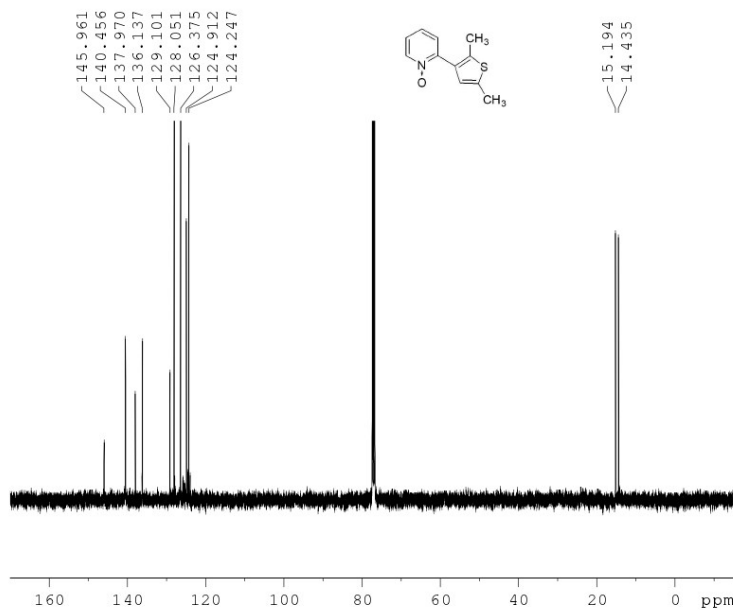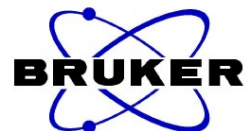

```

NAME      2015-04-23 tylg-huf
EXPNO     10
PROCNO    1
Date_     20150423
Time      17.30
INSTRUM   spect
PROBHD    5 mm PABBO BB/
PULPROG   zgpg30
TD        65536
SOLVENT   CDC13
NS        1024
DS        4
SWH       24038.461 Hz
FIDRES    0.366798 Hz
AQ        1.3631988 sec
RG        137.42
DW        20.800 usec
DE        6.50 usec
TE        297.7 K
D1        2.00000000 sec
D11       0.03000000 sec
TD0       1
  
```

```

===== CHANNEL f1 =====
SF01     100.6228293 MHz
NUC1      13C
P1        9.50 usec
SI        32768
SF        100.6127690 MHz
WDW       EM
SSB       0
LB        1.00 Hz
GB        0
PC        1.40
  
```

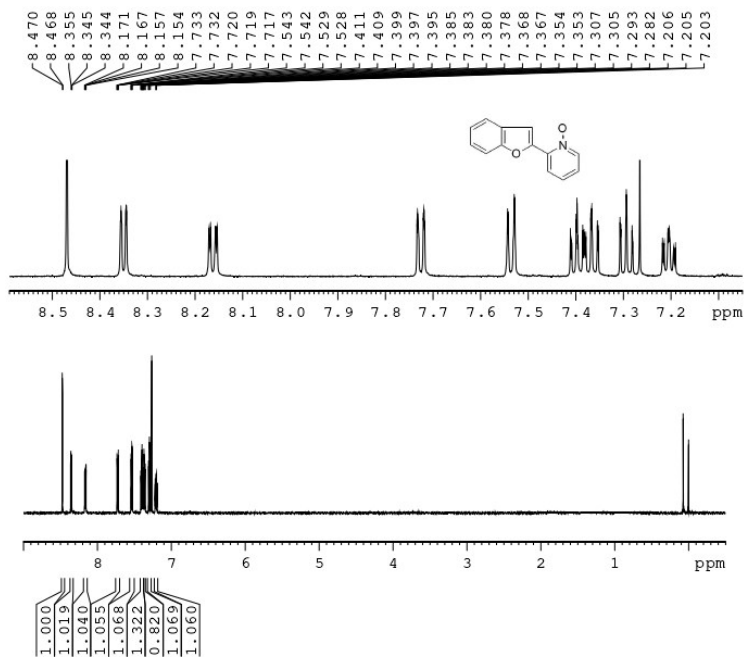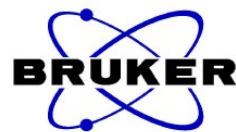

```

NAME      20150121wangmengge
EXPNO     4
PROCNO    1
Date_     20150121
Time      10.34
INSTRUM   spect
PROBHD    5 mm PADUL 13C
PULPROG   zg30
TD        65536
SOLVENT   CDC13
NS        4
DS        2
SWH       12335.526 Hz
FIDRES    0.188225 Hz
AQ        2.6564426 sec
RG        203
DW        40.533 usec
DE        6.50 usec
TE        291.1 K
D1        1.00000000 sec
  
```

```

===== CHANNEL f1 =====
NUC1      1H
P1        14.00 usec
SI        32768
SF        600.1300144 MHz
WDW       EM
SSB       0
LB        -0.10 Hz
GB        0
PC        1.00
  
```

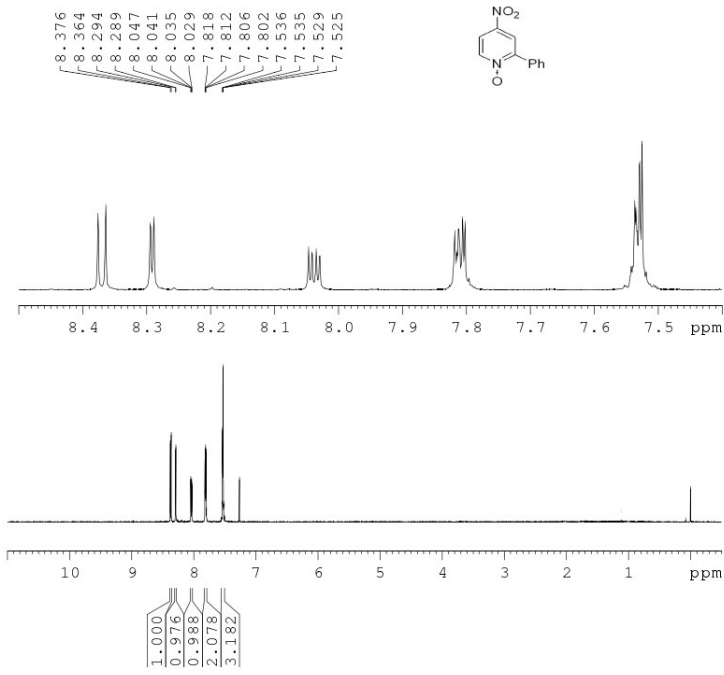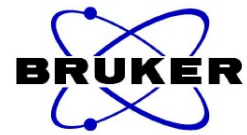

```

NAME      20150320zhouxin
EXPNO     3
PROCNO    1
Date_     20150320
Time      14.53
INSTRUM   spect
PROBHD    5 mm PADUL 13C
PULPROG   zg30
TD         65536
SOLVENT   CDCl3
NS         4
DS         2
SWH       12335.526 Hz
FIDRES    0.188225 Hz
AQ         2.6564426 sec
RG         181
DW         40.533 usec
DE         6.50 usec
TE         296.3 K
D1         1.00000000 sec

===== CHANNEL f1 =====
NUC1      1H
P1        14.00 usec
SI        32768
SF        600.1300154 MHz
WDW       EM
SSB       0
LB        -0.10 Hz
GB        0
PC        1.00
  
```

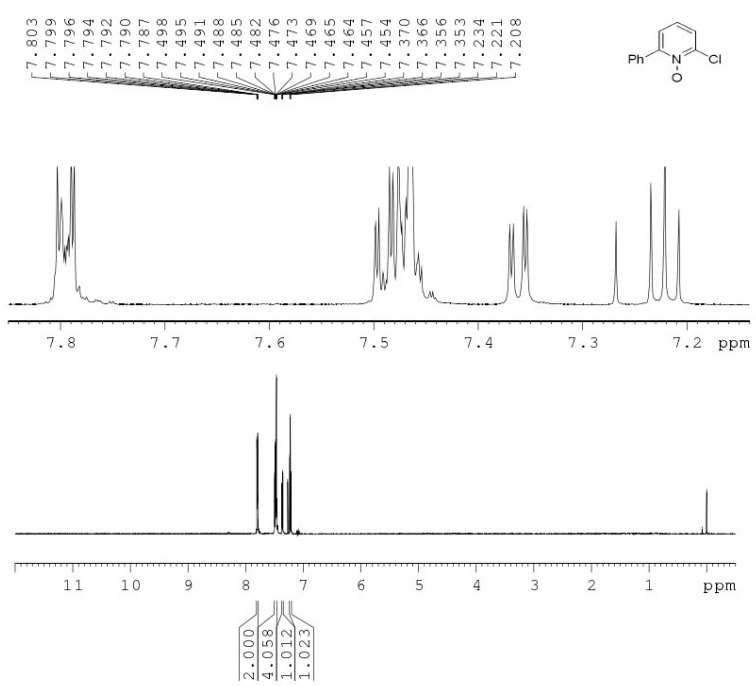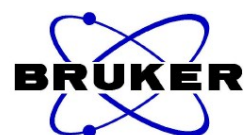

```

NAME      20150403zhourui
EXPNO     1
PROCNO    1
Date_     20150403
Time      9.53
INSTRUM   spect
PROBHD    5 mm PADUL 13C
PULPROG   zg30
TD         65536
SOLVENT   CDCl3
NS         4
DS         2
SWH       12335.526 Hz
FIDRES    0.188225 Hz
AQ         2.6564426 sec
RG         203
DW         40.533 usec
DE         6.50 usec
TE         294.2 K
D1         1.00000000 sec

===== CHANNEL f1 =====
NUC1      1H
P1        14.00 usec
SI        32768
SF        600.1300121 MHz
WDW       EM
SSB       0
LB        -0.10 Hz
GB        0
PC        1.00
  
```

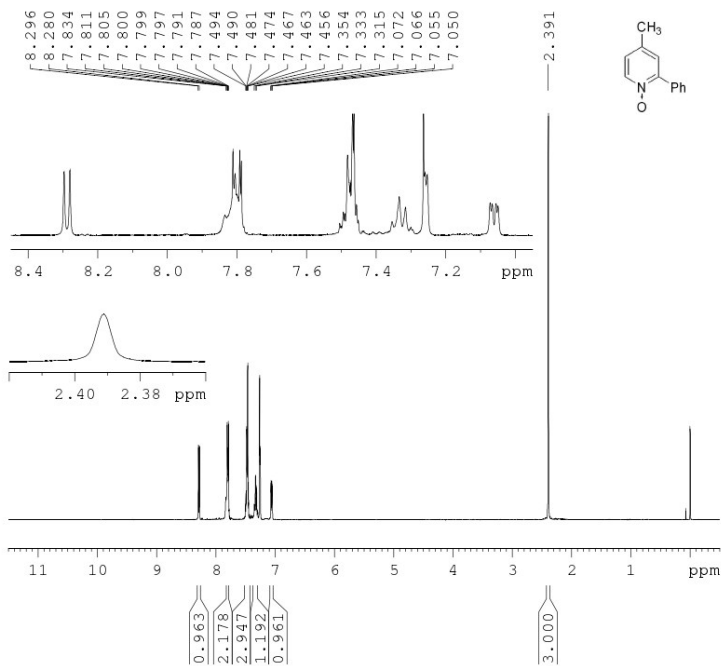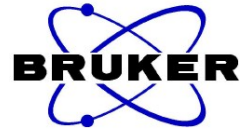

NAME 2015-04-20 tylg-huf  
 EXPNO 10  
 PROCNO 1  
 Date\_ 20150420  
 Time 10.31  
 INSTRUM spect  
 PROBHD 5 mm PABBO BB/  
 PULPROG zg30  
 TD 65536  
 SOLVENT CDCl3  
 NS 16  
 DS 2  
 SWH 8012.820 Hz  
 FIDRES 0.122266 Hz  
 AQ 4.0894966 sec  
 RG 74.25  
 DW 62.400 usec  
 DE 6.50 usec  
 TE 294.3 K  
 D1 1.00000000 sec  
 TD0 1

===== CHANNEL f1 =====  
 SFO1 400.1324710 MHz  
 NUC1 1H  
 P1 9.70 usec  
 SI 65536  
 SF 400.1300085 MHz  
 WDW EM  
 SSB 0  
 LB 0.30 Hz  
 GB 0  
 PC 1.00

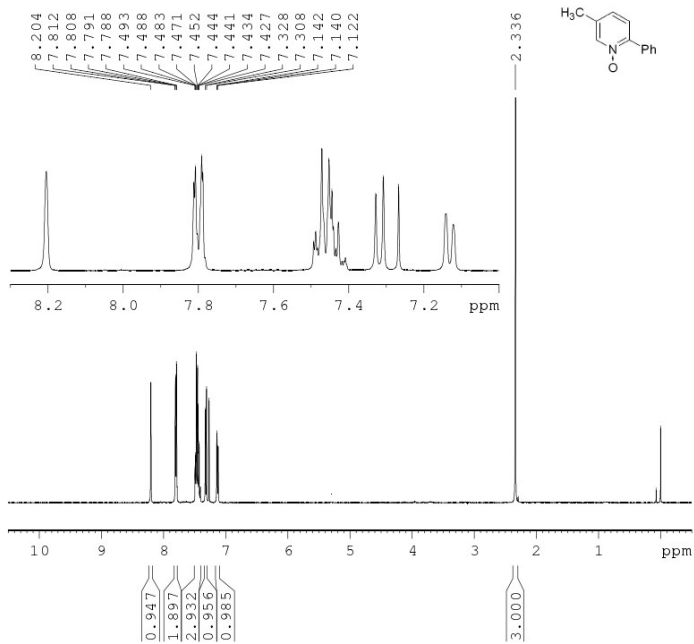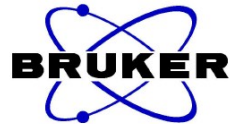

NAME 2015-04-16 tylg-huf  
 EXPNO 10  
 PROCNO 1  
 Date\_ 20150416  
 Time 9.47  
 INSTRUM spect  
 PROBHD 5 mm PABBO BB/  
 PULPROG zg30  
 TD 65536  
 SOLVENT CDCl3  
 NS 16  
 DS 2  
 SWH 8012.820 Hz  
 FIDRES 0.122266 Hz  
 AQ 4.0894966 sec  
 RG 74.25  
 DW 62.400 usec  
 DE 6.50 usec  
 TE 293.7 K  
 D1 1.00000000 sec  
 TD0 1

===== CHANNEL f1 =====  
 SFO1 400.1324710 MHz  
 NUC1 1H  
 P1 9.70 usec  
 SI 65536  
 SF 400.1300070 MHz  
 WDW EM  
 SSB 0  
 LB 0.30 Hz  
 GB 0  
 PC 1.00

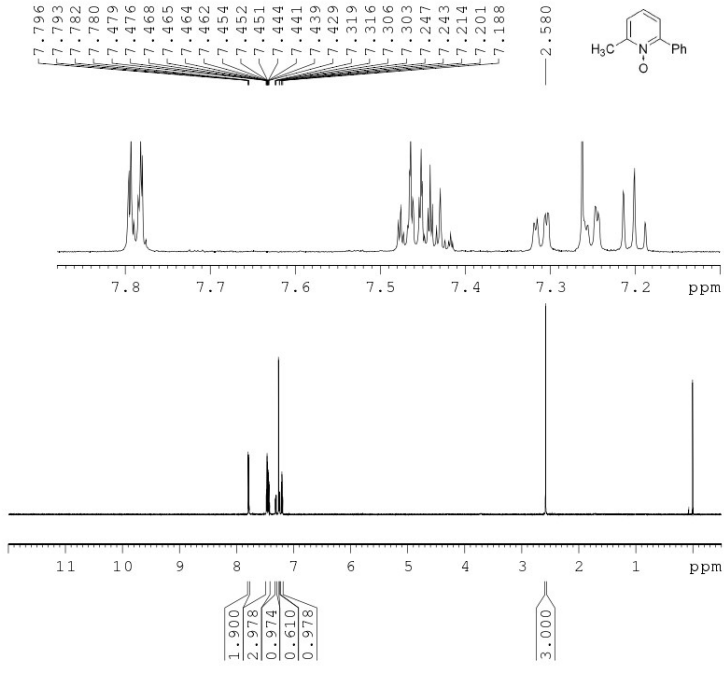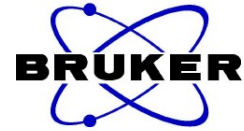

```

NAME      20150320zhouxin
EXPNO     2
PROCNO    1
Date_     20150320
Time      14.44
INSTRUM   spect
PROBHD    5 mm PADUL 13C
PULPROG   zg30
TD        65536
SOLVENT   CDCl3
NS        4
DS        2
SWH       12335.526 Hz
FIDRES    0.188225 Hz
AQ        2.6564426 sec
RG        203
DW        40.533 usec
DE        6.50 usec
TE        296.3 K
D1        1.00000000 sec

===== CHANNEL f1 =====
NUC1      1H
P1        14.00 usec
SI        32768
SF        600.1300162 MHz
WDW       EM
SSB       0
LB        -0.10 Hz
GB        0
PC        1.00
  
```

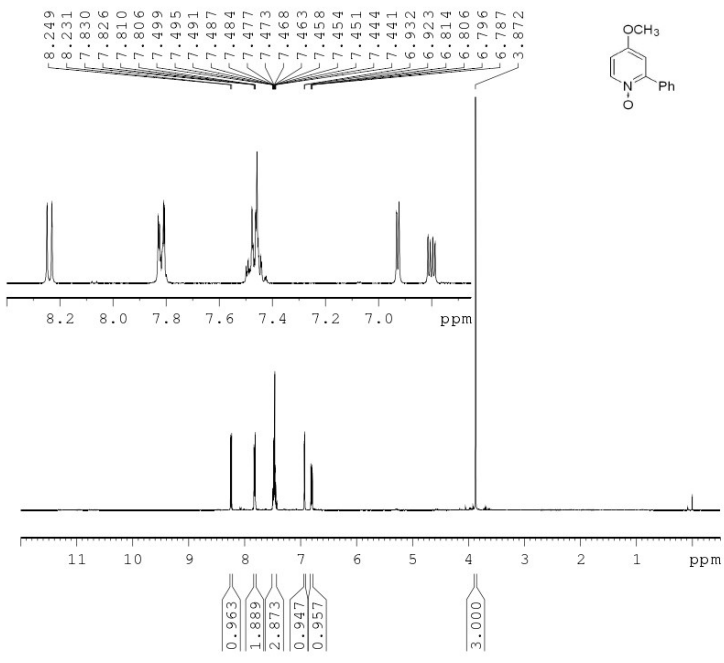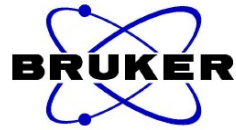

```

NAME      2015-04-16 tylg-huf
EXPNO     10
PROCNO    1
Date_     20150416
Time      9.51
INSTRUM   spect
PROBHD    5 mm PABBO BB/
PULPROG   zg30
TD        65536
SOLVENT   CDCl3
NS        16
DS        2
SWH       8012.820 Hz
FIDRES    0.122266 Hz
AQ        4.0894966 sec
RG        34.32
DW        62.400 usec
DE        6.50 usec
TE        293.7 K
D1        1.00000000 sec
TD0       1

===== CHANNEL f1 =====
SFO1     400.1324710 MHz
NUC1      1H
P1        9.70 usec
SI        65536
SF        400.1299960 MHz
WDW       EM
SSB       0
LB        0.30 Hz
GB        0
PC        1.00
  
```

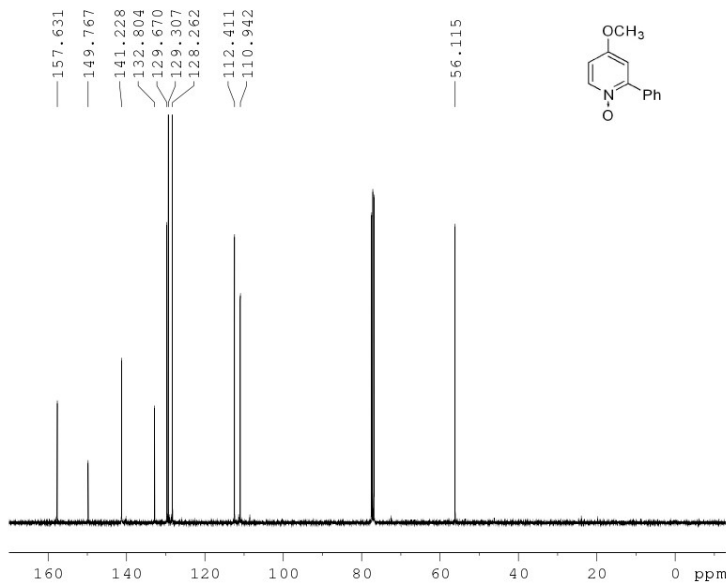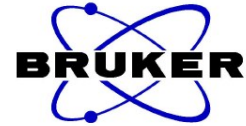

```

NAME      2015-04-16  tylg-huf
EXPNO    20
PROCNO   1
Date_    20150416
Time     10.40
INSTRUM  spect
PROBHD   5 mm PABBO BB/
PULPROG  zgpg30
TD       65536
SOLVENT  CDC13
NS       1024
DS       4
SWH      24038.461 Hz
FIDRES   0.366798 Hz
AQ       1.3631988 sec
RG       185.43
DW       20.800 usec
DE       6.50 usec
TE       294.4 K
D1       2.00000000 sec
D11      0.03000000 sec
TD0      1
  
```

```

===== CHANNEL f1 =====
SFO1    100.6228293 MHz
NUC1    13C
P1      9.50 usec
SI      32768
SF      100.6127690 MHz
WDW     EM
SSB     0
LB      1.00 Hz
GB      0
PC      1.40
  
```

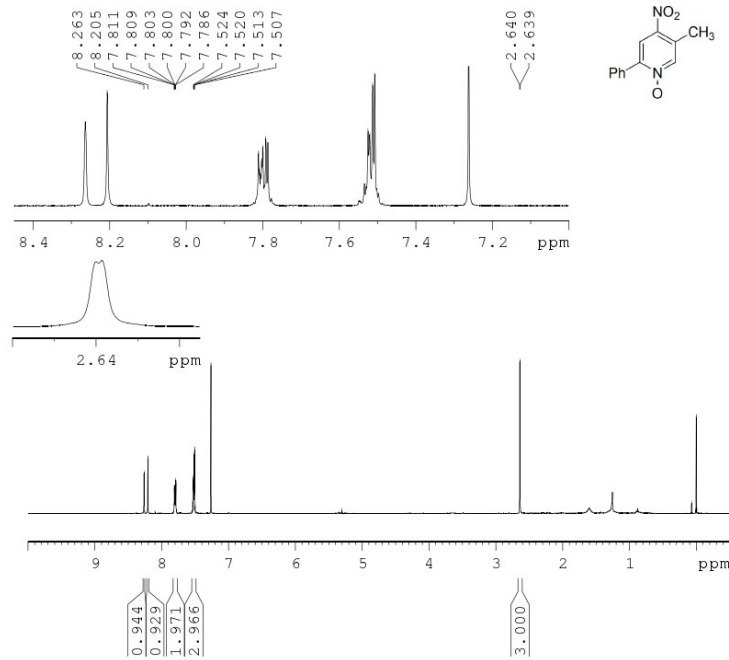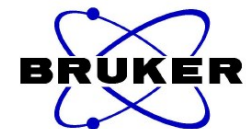

```

NAME      2015-05-07  tylg-huf
EXPNO    10
PROCNO   1
Date_    20150507
Time     12.06
INSTRUM  spect
PROBHD   5 mm PABBO BB/
PULPROG  zg30
TD       65536
SOLVENT  CDC13
NS       16
DS       2
SWH      8012.820 Hz
FIDRES   0.122266 Hz
AQ       4.0894966 sec
RG       107.24
DW       62.400 usec
DE       6.50 usec
TE       295.6 K
D1       1.00000000 sec
TD0      1
  
```

```

===== CHANNEL f1 =====
SFO1    400.1324710 MHz
NUC1    1H
P1      9.70 usec
SI      65536
SF      400.1300093 MHz
WDW     EM
SSB     0
LB      0.30 Hz
GB      0
PC      1.00
  
```
